# Supplementary material for: Microbiota Modulates Cardiac Transcriptional Responses to Intermittent Hypoxia and Hypercapnia
Source: Front Physiol. 2021 Jun 25;12:680275. doi: 10.3389/fphys.2021.680275 (PMC8267877; doi:10.3389/fphys.2021.680275)
Supplement: Supplementary file 5 [file Table_5.XLSX]

## Sheet: S5 IHH_vs_Air (GF)
Table S5. List of Significantly Altered Transcripts in GF Mice under IHH Condition
RefSeq_ID	Symbol	Name	Normalized Read Counts (Room Air)			Normalized Read Counts (IHH)			Fold_Change	lfcSE	stat	pvalue	padj	status
			GF1	GF2	GF3	GF4	GF5	GF6
NM_001310725	Kmt5a	lysine methyltransferase 5A	332.612	616.911	544.72	0	0	0	-2582.59	1.20931	9.37277	7.06566e-21	1.935e-17	OK
NM_009665	Amd1	S-adenosylmethionine decarboxylase 1	321.588	421.342	295.8	0	0	0	-1799.98	1.1964	9.03861	1.58679e-19	3.62132e-16	OK
NM_001130180	Tnnt2	troponin T2, cardiac	0	69299.9	70470.5	61.6004	13.1891	12.4453	-1602.07	2.55481	4.16693	3.08727e-05	0.00208168	OK
NM_134125	Trip10	thyroid hormone receptor interactor 10	92.2796	146.666	489.249	0	0	0	-1251.79	1.62627	6.32724	2.49578e-10	1.00514e-07	OK
NM_001102438	Acbd5	acyl-Coenzyme A binding domain containing 5	107.77	132.858	183.73	0	0	0	-734.66	1.22778	7.75458	8.86389e-15	1.10339e-11	OK
NM_001360080	Herc2	HECT and RLD domain containing E3 ubiquitin protein ligase 2	151.278	142.996	85.781	0	0	0	-657.753	1.23826	7.56015	4.02594e-14	4.59393e-11	OK
NM_001329143	Adamts10	a disintegrin-like and metallopeptidase (reprolysin type) with thrombospondin type 1 motif, 10	94.7725	120.065	117.731	0	0	0	-571.014	1.21391	7.5437	4.56815e-14	4.81166e-11	OK
NM_001361696	Slc38a10	solute carrier family 38, member 10	170.436	58.4859	88.214	10.3382	29.5721	12.4372	-6.06786	0.592646	4.38911	1.13817e-05	0.000974057	OK
NM_001039087	Rapgef1	Rap guanine nucleotide exchange factor (GEF) 1	767.111	518.233	501.245	156.101	160.619	283.623	-2.9736	0.273763	5.74296	9.30364e-09	2.40368e-06	OK
NM_001243837	C7	complement component 7	290.401	258.672	163.369	79.9904	95.4257	69.2329	-2.91143	0.271596	5.67655	1.37435e-08	3.18965e-06	OK
NM_001177650	Fnbp1	formin binding protein 1	107.934	101.601	76.1442	40.3631	36.9189	24.7836	-2.79764	0.316544	4.68879	2.74823e-06	0.000316231	OK
NM_001077407	Nrp2	neuropilin 2	149.83	135.645	130.473	46.701	43.4268	65.1326	-2.67356	0.233846	6.06707	1.30262e-09	4.57352e-07	OK
NM_001286652	Tmem176b	transmembrane protein 176B	146.705	96.6167	90.8559	27.1621	36.1538	62.1191	-2.65864	0.398365	3.5412	0.000398317	0.0154508	OK
NM_001146287	Cables1	CDK5 and Abl enzyme substrate 1	114.344	143.434	125.361	60.1997	68.4906	27.9644	-2.4511	0.354296	3.6507	0.000261526	0.0112147	OK
NM_001045964	Mink1	misshapen-like kinase 1 (zebrafish)	90.6416	90.4215	114.117	62.3055	25.2137	33.1544	-2.44349	0.392001	3.28811	0.00100861	0.0319698	OK
NM_033075	D17H6S56E-5	DNA segment, Chr 17, human D6S56E 5	83.2819	97.7089	83.2677	36.2961	40.8746	32.9794	-2.40256	0.260307	4.858	1.18578e-06	0.000160762	OK
NM_001301298	Gab1	growth factor receptor bound protein 2-associated protein 1	199.104	222.807	191.166	59.5371	86.7844	112.78	-2.36604	0.248687	4.99613	5.8493e-07	8.80159e-05	OK
NM_001364620	Mta1	metastasis associated 1	86.2062	135.3	115.33	49.7934	53.677	42.5092	-2.31395	0.277206	4.36629	1.26375e-05	0.00105515	OK
NM_001081117	Mki67	antigen identified by monoclonal antibody Ki 67	83.8283	84.5773	97.8075	30.0462	38.3696	48.4824	-2.27787	0.283705	4.18633	2.83502e-05	0.00197056	OK
NM_001164080	Timeless	timeless circadian clock 1	131.143	83.3812	132.817	32.0242	59.9343	65.1418	-2.2108	0.361894	3.16273	0.00156299	0.0435002	OK
NM_001077404	Nrp2	neuropilin 2	579.322	597.676	707.063	270.503	391.583	198.184	-2.19145	0.233699	4.84336	1.27661e-06	0.000169715	OK
NM_001042605	Cd74	CD74 antigen (invariant polypeptide of major histocompatibility complex, class II antigen-associated)	272.004	249.032	203.338	105.133	121.038	105.875	-2.18026	0.175025	6.42479	1.32049e-10	5.83274e-08	OK
NM_153484	Tef	thyrotroph embryonic factor	829.97	926.635	745.431	247.321	531.599	373.548	-2.1718	0.24883	4.49662	6.90431e-06	0.000661124	OK
NM_010382	H2-Eb1	histocompatibility 2, class II antigen E beta	654.544	556.55	337.596	235.064	251.619	234.972	-2.14494	0.236235	4.66037	3.15646e-06	0.000340727	OK
NM_001291004	H6pd	hexose-6-phosphate dehydrogenase (glucose 1-dehydrogenase)	503.988	271.011	312.178	166.299	207.529	134.643	-2.13695	0.276375	3.96402	7.36989e-05	0.00403664	OK
NM_001146053	Htatip2	HIV-1 Tat interactive protein 2	97.1324	85.4911	87.75	54.3921	35.9053	36.173	-2.13483	0.278025	3.93534	8.30795e-05	0.00440933	OK
NM_023124	H2-Q8	histocompatibility 2, Q region locus 8	129.929	218.522	264.39	71.6131	120.665	97.5218	-2.11897	0.325328	3.33008	0.000868217	0.0291588	OK
NM_010378	H2-Aa	histocompatibility 2, class II antigen A, alpha	451.22	451.637	300.53	171.715	231.187	188.282	-2.03566	0.206282	4.97136	6.64855e-07	9.78909e-05	OK
NM_009606	Acta1	actin, alpha 1, skeletal muscle	2246.96	1965.71	3607.87	1097.45	1409.49	1339.46	-2.03333	0.299455	3.41901	0.000628488	0.0226471	OK
NM_010500	Ier5	immediate early response 5	920.525	830.955	685.819	389.084	394.206	415.935	-2.0307	0.125243	8.15998	3.35093e-16	5.73553e-13	OK
NR_157105	Mfhas1	malignant fibrous histiocytoma amplified sequence 1	345.242	268.067	171.103	130.243	117.69	138.83	-2.02529	0.271493	3.7501	0.000176761	0.00838709	OK
NM_007409	Adh1	alcohol dehydrogenase 1 (class I)	168.631	243.77	160.296	104.331	72.9898	108.454	-2.00396	0.25816	3.88462	0.00010249	0.00522942	OK
NM_207105	H2-Ab1	histocompatibility 2, class II antigen A, beta 1	481.713	590.083	327.281	193.984	270.565	241.948	-1.98104	0.236746	4.1659	3.10131e-05	0.00208168	OK
NR_046233	Rn45s	45S pre-ribosomal RNA	3785.77	2100.42	3388.13	1778.15	1349.65	1600.25	-1.96115	0.207529	4.68223	2.83769e-06	0.000321128	OK
NM_011066	Per2	period circadian clock 2	792.122	726.698	561.917	253.614	325.56	503.575	-1.92112	0.252097	3.73646	0.000186631	0.00872195	OK
NM_177338	Hmbox1	homeobox containing 1	250.888	224.9	160.437	135.474	126.738	77.3864	-1.87275	0.278848	3.24605	0.00117019	0.035927	OK
NM_001285520	St3gal3	ST3 beta-galactoside alpha-2,3-sialyltransferase 3	114.922	85.7621	132.222	66.8486	56.0426	54.8746	-1.8716	0.26442	3.41982	0.000626615	0.0226391	OK
NM_010545	Cd74	CD74 antigen (invariant polypeptide of major histocompatibility complex, class II antigen-associated)	840.473	826.018	491.271	347.226	441.192	375.437	-1.85379	0.216339	4.11613	3.85279e-05	0.0024885	OK
NM_001164568	Sipa1	signal-induced proliferation associated gene 1	267.255	355.191	346.331	211.059	126.368	190.35	-1.83568	0.220924	3.96659	7.29092e-05	0.00402559	OK
NM_001348088	Tsg101	tumor susceptibility gene 101	142.35	132.872	134.578	86.2249	71.5301	66.6573	-1.82468	0.191015	4.54228	5.56496e-06	0.000548208	OK
NM_001113189	Fxr1	fragile X mental retardation gene 1, autosomal homolog	162.778	277.063	260.104	93.6082	148.167	143.498	-1.81879	0.277742	3.10712	0.00188919	0.0490867	OK
NM_001013256	Ctc1	CTS telomere maintenance complex component 1	189.727	183.528	207.027	75.3967	95.7971	148.754	-1.81328	0.267251	3.21272	0.00131486	0.0387191	OK
NM_010821	Mpeg1	macrophage expressed gene 1	178.04	170.391	153.209	88.1777	114.238	86.6592	-1.73559	0.1855	4.28801	1.80279e-05	0.00140259	OK
NM_001253920	Akt1s1	AKT1 substrate 1 (proline-rich)	106.465	149.639	141.283	76.5566	62.5468	90.6111	-1.73188	0.244391	3.2421	0.00118654	0.0362664	OK
NM_010501	Ifit3	interferon-induced protein with tetratricopeptide repeats 3	219.792	208.324	311.91	146.73	148.121	134.309	-1.72539	0.201028	3.91451	9.05877e-05	0.00471642	OK
NM_022883	Lpin3	lipin 3	129.198	100.098	112.809	60.9899	66.6748	70.4025	-1.72404	0.215244	3.65072	0.000261506	0.0112147	OK
NM_001044751	Hsd11b1	hydroxysteroid 11-beta dehydrogenase 1	232.659	241.781	184.929	135.719	143.509	106.712	-1.70898	0.18862	4.09889	4.15133e-05	0.00261955	OK
NM_008686	Nfe2l1	nuclear factor, erythroid derived 2,-like 1	1881.7	2944.95	2354.55	1131.29	1508.29	1591.77	-1.69749	0.183965	4.14973	3.32864e-05	0.00222337	OK
NM_009516	Wee1	WEE 1 homolog 1 (S. pombe)	507.947	490.953	368.041	241.255	265.249	301.006	-1.69165	0.162137	4.67772	2.90089e-06	0.000322942	OK
NM_007528	Bcl6b	B cell CLL/lymphoma 6, member B	448.105	352.497	458.225	275.632	234.39	235.721	-1.6868	0.145233	5.19363	2.06237e-07	3.73106e-05	OK
NM_001033302	Ciart	circadian associated repressor of transcription	304.872	256.693	298.914	159.469	155.201	200.731	-1.66715	0.153856	4.79271	1.64543e-06	0.000202981	OK
NM_001284328	Syncrip	synaptotagmin binding, cytoplasmic RNA interacting protein	193.925	161.213	125.588	98.8416	91.764	98.4393	-1.66106	0.218417	3.35188	0.00080264	0.0276145	OK
NM_007805	Cyb561	cytochrome b-561	282.881	227.8	253.504	180.511	163.984	116.843	-1.65573	0.196547	3.70125	0.000214541	0.00964871	OK
NM_001242390	Trip10	thyroid hormone receptor interactor 10	1044.6	976.901	1284.72	606.309	628.066	764.837	-1.65382	0.138543	5.23881	1.61612e-07	3.07355e-05	OK
NM_001112705	Tlk2	tousled-like kinase 2 (Arabidopsis)	195.086	290.23	212.205	120.725	126.596	175.068	-1.65234	0.232833	3.11172	0.00185999	0.0486975	OK
NM_001252637	Rhobtb1	Rho-related BTB domain containing 1	2308.94	2814.72	2200.02	1264.4	1546.3	1650.8	-1.64172	0.131224	5.45024	5.03011e-08	1.07621e-05	OK
NM_001081150	Lonrf1	LON peptidase N-terminal domain and ring finger 1	234.321	280.795	255.794	125.285	153.328	192.888	-1.63559	0.18837	3.76818	0.000164443	0.00790077	OK
NM_013467	Aldh1a1	aldehyde dehydrogenase family 1, subfamily A1	342.711	271.461	275.837	182.167	158.551	203.707	-1.63206	0.159832	4.42148	9.80283e-06	0.000854969	OK
NM_028195	Cyth4	cytohesin 4	125.914	117.457	119.087	68.2286	83.0814	72.4213	-1.62054	0.190941	3.64757	0.000264731	0.0112576	OK
NM_001277970	Itga6	integrin alpha 6	533.238	673.85	786.057	325.326	488.687	424.021	-1.61091	0.193156	3.56125	0.000369094	0.0145649	OK
NM_178589	Tnfrsf21	tumor necrosis factor receptor superfamily, member 21	371.891	488.336	372.978	259.036	251.323	256.191	-1.61013	0.142371	4.8267	1.38817e-06	0.000179187	OK
NM_011784	Aplnr	apelin receptor	962.688	750.633	1129.57	676.396	580.595	516.165	-1.60321	0.17002	4.00519	6.19668e-05	0.00362612	OK
NM_007734	Col4a3	collagen, type IV, alpha 3	121.177	107.585	129.892	64.9888	77.8759	80.9218	-1.60277	0.204621	3.32601	0.000880972	0.0292253	OK
NM_008726	Nppb	natriuretic peptide type B	845.431	996.846	745.011	490.701	618.217	522.609	-1.58672	0.13991	4.76053	1.93087e-06	0.000225978	OK
NM_007984	Fscn1	fascin actin-bundling protein 1	544.115	595.893	662.977	360.623	398.712	379.693	-1.58529	0.104585	6.35599	2.07093e-10	8.5931e-08	OK
NM_007631	Ccnd1	cyclin D1	1142.26	1115.15	1360.61	774.852	806.366	707.83	-1.58118	0.102599	6.4426	1.17447e-10	5.54552e-08	OK
NM_001013390	Scn4b	sodium channel, type IV, beta	844.745	873.482	957.697	679.622	566.447	457.727	-1.5709	0.146307	4.45362	8.4433e-06	0.000760619	OK
NM_028243	Prcp	prolylcarboxypeptidase (angiotensinase C)	186.586	193.819	197.163	134.578	114.447	118.953	-1.56971	0.145303	4.47683	7.57602e-06	0.000700046	OK
NM_001005385	Gprasp1	G protein-coupled receptor associated sorting protein 1	277.917	351.771	290.167	217.477	174.321	195.012	-1.56827	0.151716	4.27885	1.87858e-05	0.00143706	OK
NM_019696	Cpxm1	carboxypeptidase X 1 (M14 family)	102.958	116.128	113.753	74.6336	68.8474	70.3054	-1.55848	0.1942	3.29629	0.000979695	0.0312703	OK
NM_011067	Per3	period circadian clock 3	876.554	766.183	909.271	452.45	503.597	683.563	-1.55613	0.162612	3.92324	8.7367e-05	0.00460121	OK
NM_013753	Pald1	phosphatase domain containing, paladin 1	489.42	634.604	602.572	387.752	372.878	351.424	-1.55468	0.122594	5.19286	2.07085e-07	3.73106e-05	OK
NM_016701	Nes	nestin	1314.41	1375.33	1679.06	971.61	915.481	931.404	-1.55063	0.105419	6.00326	1.93399e-09	6.30528e-07	OK
NM_001001735	Nsd3	nuclear receptor binding SET domain protein 3	153.102	133.192	141.908	78.029	97.9651	100.242	-1.54892	0.18592	3.39535	0.000685403	0.0241887	OK
NM_027872	Slc46a3	solute carrier family 46, member 3	204.849	218.896	193.882	159.421	112.695	127.032	-1.54655	0.173855	3.61827	0.000296577	0.0121953	OK
NM_011750	Sf1	splicing factor 1	527.533	431.611	384.395	295.484	228.451	345.467	-1.54342	0.188803	3.31633	0.000912072	0.0297556	OK
NM_016873	Ccn5	cellular communication network factor 5	178.856	130.257	159.002	99.1685	113.347	90.5336	-1.54276	0.201954	3.09731	0.00195289	0.0498897	OK
NM_207624	Ace	angiotensin I converting enzyme (peptidyl-dipeptidase A) 1	866.927	865.367	701.217	403.337	634.283	550.976	-1.53203	0.175766	3.5015	0.000462646	0.0174039	OK
NM_198649	Ablim3	actin binding LIM protein family, member 3	293.014	318.899	246.23	177.328	174.191	209.526	-1.52848	0.154131	3.97128	7.14886e-05	0.00399548	OK
NM_001359175	Srpk2	serine/arginine-rich protein specific kinase 2	204.4	222.917	254.027	132.012	143.556	170.598	-1.52817	0.164503	3.71909	0.000199945	0.00915667	OK
NM_001199004	Golga5	golgi autoantigen, golgin subfamily a, 5	500.564	506.925	500.091	337.499	344.299	306.424	-1.52621	0.0869935	7.01144	2.3587e-12	1.79431e-09	OK
NM_001290769	Sqstm1	sequestosome 1	1454.61	1881.57	1710.28	1065.31	1178.39	1074.12	-1.522	0.10656	5.6866	1.29592e-08	3.11317e-06	OK
NM_001079814	Glyr1	glyoxylate reductase 1 homolog (Arabidopsis)	722.872	721.742	658.57	511.182	447.202	425.026	-1.51965	0.0964105	6.2622	3.79575e-10	1.485e-07	OK
NM_013468	Ankrd1	ankyrin repeat domain 1 (cardiac muscle)	8365.83	11028.5	10117.4	7018.53	6004.72	6401.04	-1.51941	0.111011	5.43652	5.4332e-08	1.14457e-05	OK
NM_175398	Inka2	inka box actin regulator 2	1027.62	781.034	692.601	429.832	644.623	572.314	-1.51845	0.194278	3.10174	0.00192389	0.0496118	OK
NM_001359263	Ivns1abp	influenza virus NS1A binding protein	3592.58	3389.29	2802.43	1788.97	2079.27	2582.01	-1.5168	0.148523	4.04673	5.19379e-05	0.00313298	OK
NM_001252682	Dhx30	DEAH (Asp-Glu-Ala-His) box polypeptide 30	187.802	240.231	193.343	112.648	151.436	146.768	-1.51453	0.1881	3.18378	0.00145368	0.0412971	OK
NM_001313922	Nos2	nitric oxide synthase 2, inducible	175.278	178.908	174.463	119.936	110.159	118.956	-1.51393	0.145008	4.12597	3.69169e-05	0.00241867	OK
NM_001355651	Gpcpd1	glycerophosphocholine phosphodiesterase 1	527.438	756.252	614.549	382.524	490.412	390.863	-1.50326	0.16576	3.5479	0.000388314	0.0151487	OK
NM_011018	Sqstm1	sequestosome 1	5163.15	5141.51	5035.34	3376.81	3353.39	3488.16	-1.50092	0.0349292	16.7723	3.8896e-63	5.32603e-59	OK
NM_001287739	Cebpb	CCAAT/enhancer binding protein (C/EBP), beta	375.463	353.456	270.174	200.266	207.72	258.402	-1.49602	0.177237	3.27886	0.00104228	0.0328091	OK
NM_008425	Kcnj2	potassium inwardly-rectifying channel, subfamily J, member 2	718.752	838.267	876.102	1138.28	1306.12	1203.63	1.49818	0.0973318	-5.99201	2.07269e-09	6.60031e-07	OK
NM_175191	Gpr22	G protein-coupled receptor 22	672.48	600.307	594.413	904.42	914.14	983.504	1.50219	0.078757	-7.45415	9.04462e-14	8.84628e-11	OK
NM_028133	Egln3	egl-9 family hypoxia-inducible factor 3	708.455	743.531	701.276	920.414	1229.99	1086.71	1.50295	0.114339	-5.14083	2.73528e-07	4.62398e-05	OK
NM_172520	Arhgef19	Rho guanine nucleotide exchange factor (GEF) 19	418.784	431.549	518.234	720.26	703.971	671.533	1.52947	0.102754	-5.96599	2.43162e-09	7.39914e-07	OK
NM_001039522	Leo1	Leo1, Paf1/RNA polymerase II complex component	127.343	164.268	200.919	266.673	264.255	226.5	1.53443	0.194277	-3.17948	0.00147541	0.0416553	OK
NM_023735	Actr3	ARP3 actin-related protein 3	705.52	970.599	900.207	1514.83	1312.59	1134.2	1.53683	0.150537	-4.11834	3.81606e-05	0.00247646	OK
NM_010238	Brd2	bromodomain containing 2	509.205	378.856	627.696	776.682	890.051	677.683	1.54654	0.192801	-3.26267	0.00110367	0.0344813	OK
NM_011361	Sgk1	serum/glucocorticoid regulated kinase 1	437.545	417.584	636.658	788.001	648.746	879.272	1.55222	0.190497	-3.32988	0.000868824	0.0291588	OK
NM_178791	Vstm4	V-set and transmembrane domain containing 4	117.751	163.695	163.57	256.108	234.16	206.725	1.56229	0.182261	-3.53156	0.000413122	0.0159799	OK
NM_001164101	Add3	adducin 3 (gamma)	211.356	254.428	168.23	334.393	303.812	359.408	1.5733	0.174417	-3.74847	0.000177916	0.00840069	OK
NM_025729	Tab3	TGF-beta activated kinase 1/MAP3K7 binding protein 3	122.723	137.409	100.61	218.914	176.381	175.711	1.58262	0.189956	-3.48668	0.000489063	0.018002	OK
NM_020295	Lmbr1	limb region 1	215.729	205.942	217.302	374.695	324.262	318.029	1.59228	0.116814	-5.74499	9.19284e-09	2.40368e-06	OK
NM_029083	Ddit4	DNA-damage-inducible transcript 4	422.331	598.852	525.835	805.322	649.447	1013.95	1.59493	0.191487	-3.51717	0.00043617	0.0165827	OK
NM_001128151	Cecr2	CECR2, histone acetyl-lysine reader	235.844	236.295	314.64	406.658	415.872	440.457	1.60379	0.140543	-4.84893	1.24127e-06	0.000166635	OK
NM_172783	Phka2	phosphorylase kinase alpha 2	192.884	241.611	172.479	265.219	349.281	370.535	1.62211	0.191157	-3.65078	0.000261444	0.0112147	OK
NM_001289826	Clock	circadian locomotor output cycles kaput	209.53	237.662	245.527	345.468	480.297	302.654	1.62779	0.194071	-3.62194	0.000292398	0.0120597	OK
NM_001159564	Itgb6	integrin beta 6	151.219	208.404	228.158	313.453	347.174	309.492	1.64703	0.171526	-4.19681	2.70699e-05	0.00190086	OK
NM_001278161	Hbb-b1	hemoglobin, beta adult major chain	12979.5	9845.66	12992.1	24259.4	18637.4	16105.9	1.64738	0.165393	-4.35433	1.33475e-05	0.00110768	OK
NM_020559	Alas1	aminolevulinic acid synthase 1	2205.84	2336.9	2198.13	3744.82	3762.15	3609.76	1.64862	0.0448016	-16.099	2.59205e-58	1.77465e-54	OK
NM_001358314	Srebf1	sterol regulatory element binding transcription factor 1	226.714	325.058	371.194	534.27	456.205	536.5	1.65181	0.186415	-3.88405	0.000102732	0.00522942	OK
NM_029361	Wnk2	WNK lysine deficient protein kinase 2	110.255	121.636	137.982	145.83	231.587	249.783	1.69352	0.244405	-3.10969	0.00187281	0.0488464	OK
NM_001252647	4833439L19Rik	RIKEN cDNA 4833439L19 gene	85.3361	95.0324	99.9444	192.324	155.182	128.159	1.69503	0.216308	-3.51957	0.000432252	0.016533	OK
NM_001037493	Slc41a3	solute carrier family 41, member 3	497.259	368.653	680.099	1064.41	807.679	757.503	1.70086	0.229801	-3.33448	0.000854601	0.0288228	OK
NM_201245	Mprip	myosin phosphatase Rho interacting protein	257.716	241.117	203.113	407.511	323.612	463.66	1.70421	0.170536	-4.50991	6.48565e-06	0.000625408	OK
NM_007669	Cdkn1a	cyclin-dependent kinase inhibitor 1A (P21)	109.083	139.031	117.086	231.248	186.651	209.396	1.71485	0.168998	-4.60413	4.14196e-06	0.000432945	OK
NM_001013758	Lingo3	leucine rich repeat and Ig domain containing 3	198.389	187.807	196.935	368.955	375.112	260.534	1.72245	0.170741	-4.59447	4.33853e-06	0.000450057	OK
NM_001166370	Trmt112	tRNA methyltransferase 11-2	210.227	185.628	134.904	398.511	228.191	298.23	1.745	0.256139	-3.1359	0.00171327	0.0464551	OK
NM_009061	Rgs2	regulator of G-protein signaling 2	406.922	448.597	563.564	886.922	767.168	832.063	1.751	0.134559	-6.00617	1.8996e-09	6.30528e-07	OK
NM_011806	Dmtf1	cyclin D binding myb-like transcription factor 1	89.7129	77.1957	79.4021	176.299	130.795	131.643	1.7838	0.211228	-3.95285	7.72257e-05	0.00417965	OK
NM_001286664	Ssbp1	single-stranded DNA binding protein 1	76.235	77.724	77.1949	135.159	160.941	120.818	1.80265	0.198359	-4.28576	1.82114e-05	0.00140886	OK
NM_175164	Arhgap26	Rho GTPase activating protein 26	698.276	725.653	693.437	976.243	1589.31	1267.55	1.81003	0.167115	-5.12231	3.0181e-07	4.91986e-05	OK
NM_001276767	Zc3h11a	zinc finger CCCH type containing 11A	182.126	295.811	258.413	438.152	472.735	425.951	1.81226	0.179977	-4.76612	1.8781e-06	0.000223624	OK
NM_182996	Zfp692	zinc finger protein 692	44.317	41.4866	53.7442	78.5519	94.8222	79.9232	1.81241	0.254718	-3.36809	0.000756903	0.0263722	OK
NM_177697	Vwa3a	von Willebrand factor A domain containing 3A	110.748	84.8449	81.0668	134.594	210.559	160.722	1.83138	0.246102	-3.54703	0.000389602	0.0151557	OK
NM_173874	Clcn3	chloride channel, voltage-sensitive 3	102.47	78.6889	52.1123	136.816	163.32	134.872	1.86885	0.283025	-3.18752	0.00143496	0.0410208	OK
NM_001008793	Whrn	whirlin	126.583	177.455	121.423	228.06	309.396	260.036	1.87084	0.208334	-4.33768	1.43992e-05	0.00117362	OK
NM_001360393	Sf1	splicing factor 1	53.4831	34.0831	54.2636	76.2577	98.9989	92.062	1.88843	0.293452	-3.12551	0.00177498	0.0475632	OK
NM_028720	Glyr1	glyoxylate reductase 1 homolog (Arabidopsis)	266.404	230.228	269.962	415.975	506.701	538.522	1.90696	0.135937	-6.85078	7.34507e-12	5.29347e-09	OK
NM_001286419	Rbfox2	RNA binding protein, fox-1 homolog (C. elegans) 2	85.4859	161.93	140.793	272.649	269.014	206.396	1.92253	0.260188	-3.62432	0.000289722	0.0120202	OK
NM_008963	Ptgds	prostaglandin D2 synthase (brain)	1423.94	1312.28	1300.43	2091.72	3111.93	2574.58	1.927	0.13977	-6.77082	1.28058e-11	8.34999e-09	OK
NM_001110846	Cacna2d1	calcium channel, voltage-dependent, alpha2/delta subunit 1	424.853	299.591	669.146	802.27	1008.54	889.991	1.93818	0.262582	-3.63582	0.000277101	0.0116035	OK
NM_010212	Fhl2	four and a half LIM domains 2	52.4026	69.5402	87.4332	98.9952	161.223	148.031	1.9446	0.300116	-3.19701	0.00138861	0.0401992	OK
NM_001040395	Nadk2	NAD kinase 2, mitochondrial	249.637	135.562	225.506	446.611	479.761	288.221	1.99108	0.278233	-3.57093	0.000355713	0.0141182	OK
NM_134134	Hmgxb3	HMG box domain containing 3	93.5938	83.1439	50.4135	149.326	165.864	137.376	1.99754	0.269748	-3.70059	0.000215102	0.00964871	OK
NR_153838	Rnf114	ring finger protein 114	92.1181	85.5881	53.6787	136.15	165.138	159.985	1.99768	0.253202	-3.94279	8.05382e-05	0.00430785	OK
NM_053085	Tcf23	transcription factor 23	40.7856	45.3633	40.9341	72.491	86.6559	97.0921	2.01474	0.259434	-3.89537	9.80483e-05	0.00508551	OK
NM_001364918	Mpc1	mitochondrial pyruvate carrier 1	276.692	274.146	431.701	431.774	813.547	738.21	2.01831	0.272012	-3.72464	0.000195597	0.00910988	OK
NM_153584	Fam214a	family with sequence similarity 214, member A	117.501	192.331	140.604	310.528	294.256	306.738	2.01929	0.192688	-5.26162	1.42791e-07	2.87535e-05	OK
NM_001143790	Ctc1	CTS telomere maintenance complex component 1	72.3272	61.7815	76.8465	160.092	167.64	105.366	2.05275	0.257503	-4.02931	5.59413e-05	0.00330174	OK
NM_001363323	Zfp644	zinc finger protein 644	46.4672	63.2792	68.3793	120.179	149.925	100.704	2.07637	0.268903	-3.91986	8.85992e-05	0.00464824	OK
NM_001355412	Ncdn	neurochondrin	25.3826	51.2253	49.0944	82.3362	98.3912	89.5195	2.13622	0.333547	-3.28307	0.00102684	0.0324722	OK
NM_001357376	Adhfe1	alcohol dehydrogenase, iron containing, 1	69.5093	83.3856	62.0859	94.2979	184.114	188.305	2.16975	0.32562	-3.432	0.000599156	0.0218198	OK
NM_001357395	Smap1	small ArfGAP 1	36.3963	26.8808	60.8648	101.938	94.8211	80.9896	2.23644	0.368139	-3.15426	0.00160905	0.0441538	OK
NM_001159603	Pum1	pumilio RNA-binding family member 1	67.7965	125.438	164.009	179.589	274.975	355.811	2.26489	0.368342	-3.20204	0.0013646	0.0396554	OK
NM_001199203	Spag9	sperm associated antigen 9	96.3532	75.3133	118.907	311.565	161.172	201.063	2.31984	0.306139	-3.9656	7.3213e-05	0.00402613	OK
NM_027922	Ankle2	ankyrin repeat and LEM domain containing 2	52.9412	86.9709	43.4569	129.6	100.661	243.418	2.58138	0.429533	-3.18519	0.00144658	0.041181	OK
NM_020581	Angptl4	angiopoietin-like 4	99.9755	107.81	48.6668	274.048	204.029	183.248	2.58169	0.3301	-4.14516	3.39576e-05	0.00225719	OK
NM_001361023	Dglucy	D-glutamate cyclase	45.9242	26.3577	72.0865	165.82	102.637	107.303	2.60261	0.421999	-3.27006	0.00107524	0.033769	OK
NM_029895	Etl4	enhancer trap locus 4	33.5094	36.1258	16.4172	64.0483	61.79	103.524	2.67043	0.437041	-3.24242	0.0011852	0.0362664	OK
NM_213660	Stat3	signal transducer and activator of transcription 3	126.74	69.0866	142.387	273.557	430.171	221.75	2.73719	0.342178	-4.24543	2.18171e-05	0.00162359	OK
NM_011638	Tfrc	transferrin receptor	1034.67	887.646	1267.97	2834.2	3037.64	3108.27	2.81529	0.126503	-11.8043	3.70884e-32	1.69284e-28	OK
NM_001304810	Kcnj3	potassium inwardly-rectifying channel, subfamily J, member 3	37.4087	11.5809	29.8685	79.4454	115.039	66.774	3.32759	0.493437	-3.51509	0.000439607	0.0165827	OK
NM_001277328	Sox6	SRY (sex determining region Y)-box 6	57.0998	30.9862	27.7488	163.137	117.685	123.094	3.50548	0.347072	-5.21394	1.84867e-07	3.46766e-05	OK
NM_001357298	Tfrc	transferrin receptor	11.3253	65.3857	25.5555	136.468	133.816	147.126	4.0647	0.563708	-3.589	0.000331945	0.013408	OK
NM_001313974	Prkar1a	protein kinase, cAMP dependent regulatory, type I, alpha	25.9662	24.3609	23.1762	256.691	24.675	170.002	6.14343	0.717742	-3.64901	0.000263257	0.0112298	OK
NM_001355067	Ctnnd1	catenin (cadherin associated protein), delta 1	0	0	0	145.948	152.402	18.557	600.784	1.48004	-6.23681	4.46597e-10	1.66903e-07	OK
NM_001199308	Gm14440	predicted gene 14440	0	0	0	133.631	156.366	63.0523	670.098	1.28002	-7.33443	2.22674e-13	2.03272e-10	OK
NM_198300	Cpeb3	cytoplasmic polyadenylation element binding protein 3	0	0	0	185.347	184.81	41.4943	785.391	1.36457	-7.04785	1.81709e-12	1.46362e-09	OK
NM_013747	Golga5	golgi autoantigen, golgin subfamily a, 5	0	0	0	151.541	128.835	200.074	912.222	1.21576	-8.08814	6.05835e-16	9.21744e-13	OK
NM_001199186	Slc44a2	solute carrier family 44, member 2	0	0	0	222.622	265.231	248.508	1400.13	1.19084	-8.77643	1.6875e-18	3.30099e-15	OK
