# Supplementary material for: Microbiota Modulates Cardiac Transcriptional Responses to Intermittent Hypoxia and Hypercapnia
Source: Front Physiol. 2021 Jun 25;12:680275. doi: 10.3389/fphys.2021.680275 (PMC8267877; doi:10.3389/fphys.2021.680275)
Supplement: Supplementary file 6 [file Table_6.XLSX]

## Sheet: a) DAVID Functional Annotation
Table S6a. Summary of DAVID Functional Annotation in CONV Mice following IHH Treatment
a) DAVID Functional Analysis Clusters:
Annotation Cluster 1	Enrichment Score: 6.2569803796447
Category	Term	Count	%	PValue	Genes	List Total	Pop Hits	Pop Total	Fold Enrichment	Bonferroni	Benjamini	FDR
UP_KEYWORDS	Transcription regulation	41	23.5632	3.75922e-10	SATB1, NOTCH4, ZBTB43, MED16, HDAC7, MECP2, SBNO2, KAT5, CCND1, HEY1, CUX1, SOX18, GPBP1, KMT5B, ZFP280D, SOX7, BCL9L, RUNX1T1, KLF10, RBM39, CHTOP, SMARCC2, ZFP1, STAT1, NFYC, PBX3, TFB2M, SENP2, ZFX, UCHL5, KLF2, RUNX2, FOSL2, NFKB2, ETV6, NR4A1, ELF1, HNRNPK, DDIT3, TXNIP, LHX6	172	1799	22680	3.00516	7.96954e-08	2.65651e-08	2.50614e-08
UP_KEYWORDS	Transcription	41	23.5632	9.83582e-10	SATB1, NOTCH4, ZBTB43, MED16, HDAC7, MECP2, SBNO2, KAT5, CCND1, HEY1, CUX1, SOX18, GPBP1, KMT5B, ZFP280D, SOX7, BCL9L, RUNX1T1, KLF10, RBM39, CHTOP, SMARCC2, ZFP1, STAT1, NFYC, PBX3, TFB2M, SENP2, ZFX, UCHL5, KLF2, RUNX2, FOSL2, NFKB2, ETV6, NR4A1, ELF1, HNRNPK, DDIT3, TXNIP, LHX6	172	1859	22680	2.90817	2.08519e-07	5.21299e-08	4.91791e-08
GOTERM_BP_DIRECT	GO:0006351~transcription, DNA-templated	42	24.1379	2.92266e-08	SATB1, PPP1R10, NOTCH4, ZBTB43, MED16, HDAC7, MECP2, SBNO2, KAT5, CCND1, HEY1, CUX1, SOX18, GPBP1, KMT5B, ZFP280D, SOX7, BCL9L, RUNX1T1, KLF10, RBM39, CHTOP, SMARCC2, ZFP1, STAT1, NFYC, PBX3, TFB2M, SENP2, ZFX, UCHL5, KLF2, RUNX2, FOSL2, NFKB2, ETV6, NR4A1, ELF1, HNRNPK, DDIT3, TXNIP, LHX6	160	1885	18082	2.51805	3.20026e-05	3.20031e-05	3.19154e-05
UP_KEYWORDS	Nucleus	66	37.931	3.68663e-08	INVS, ERRFI1, PPP1R10, MED16, IKBKB, MECP2, RGS2, CCND1, KAT5, HEY1, SOX18, GPBP1, FBXO3, SNIP1, KMT5B, BTRC, ZFP280D, SOX7, TMPO, KLF10, SMARCC2, ZFP1, PPP2R5C, SENP2, ZFX, UCHL5, RUNX2, ETV6, ELF1, DDIT3, MTF2, SIK1, TNIK, CRYAB, FKBP5, RBM47, SATB1, NOTCH4, ZBTB43, BRCC3, HDAC7, TTN, CUX1, MBP, BCL9L, RUNX1T1, RBM39, CPSF7, CHTOP, STAT1, FBXO38, NFYC, PBX3, WWP1, GCK, KLF2, FOSL2, NFKB2, CLK1,…	172	4534	22680	1.91945	7.81563e-06	1.56313e-06	1.47465e-06
GOTERM_BP_DIRECT	GO:0006355~regulation of transcription, DNA-templated	46	26.4368	9.10527e-08	SATB1, NOTCH4, ZBTB43, MED16, HDAC7, MECP2, SBNO2, KAT5, CCND1, HEY1, CUX1, SOX18, GPBP1, SNIP1, KMT5B, ZFP280D, SOX7, TMPO, BCL9L, RUNX1T1, KLF10, ZFP655, RBM39, CHTOP, RNF44, SMARCC2, ZFP1, STAT1, NFYC, PBX3, TFB2M, GM14296, SENP2, ZFX, UCHL5, KLF2, RUNX2, FOSL2, NFKB2, ETV6, NR4A1, ELF1, HNRNPK, DDIT3, TXNIP, LHX6	160	2279	18082	2.28108	9.96977e-05	4.98513e-05	4.97148e-05
UP_KEYWORDS	Activator	19	10.9195	1.23752e-06	RBM39, STAT1, NOTCH4, NFYC, PBX3, SENP2, MED16, ZFX, KLF2, NFKB2, SBNO2, ELF1, HNRNPK, KAT5, SOX18, DDIT3, GPBP1, SOX7, BCL9L	172	624	22680	4.01498	0.000262321	4.37259e-05	4.12508e-05
UP_KEYWORDS	DNA-binding	31	17.8161	3.32163e-06	SATB1, PPP1R10, ZBTB43, MECP2, HEY1, CUX1, SOX18, GPBP1, ZFP280D, SOX7, TMPO, RUNX1T1, KLF10, ZFP1, STAT1, NFYC, PBX3, ZFX, KLF2, RUNX2, FOSL2, NFKB2, ETV6, NR4A1, ELF1, HNRNPK, XRN1, DDIT3, MTF2, LHX6, SSBP1	172	1604	22680	2.54843	0.000703938	0.000100598	9.49037e-05
GOTERM_MF_DIRECT	GO:0003700~transcription factor activity, sequence-specific DNA binding	23	13.2184	1.55161e-05	ZFP655, ZFP1, SATB1, STAT1, ZFP438, NFYC, PBX3, ZFX, RUNX2, KLF2, FOSL2, NFKB2, ETV6, MECP2, NR4A1, ELF1, HEY1, SOX18, DDIT3, GPBP1, LHX6, SOX7, RUNX1T1	159	883	17446	2.85802	0.00475215	0.00238172	0.00234293
GOTERM_MF_DIRECT	GO:0003677~DNA binding	33	18.9655	0.000230644	SATB1, PPP1R10, ZBTB43, MECP2, HEY1, CUX1, SOX18, GPBP1, ZFP280D, SOX7, TMPO, RUNX1T1, KLF10, SMARCC2, ZFP1, STAT1, NFYC, PBX3, ZFX, KLF2, RUNX2, FOSL2, NFKB2, ETV6, NR4A1, ELF1, HNRNPK, XRN1, DDIT3, BCL6B, MTF2, LHX6, SSBP1	159	1847	17446	1.9604	0.0683665	0.0236025	0.0232181
GOTERM_MF_DIRECT	GO:0043565~sequence-specific DNA binding	14	8.04598	0.00504614	SATB1, STAT1, PBX3, KLF2, FOSL2, ETV6, NR4A1, ELF1, HEY1, CUX1, SOX18, DDIT3, LHX6, SOX7	159	633	17446	2.42674	0.788406	0.172129	0.169326
Annotation Cluster 2	Enrichment Score: 2.6990059490762794
Category	Term	Count	%	PValue	Genes	List Total	Pop Hits	Pop Total	Fold Enrichment	Bonferroni	Benjamini	FDR
GOTERM_BP_DIRECT	GO:0045893~positive regulation of transcription, DNA-templated	17	9.77011	4.96271e-05	SMARCC2, STAT1, NFYC, TFB2M, MED16, RUNX2, KLF2, FOSL2, MECP2, NR4A1, ELF1, KAT5, SOX18, DDIT3, GPBP1, BTRC, SOX7	160	576	18082	3.33544	0.0528929	0.0144479	0.0144084
GOTERM_MF_DIRECT	GO:0000978~RNA polymerase II core promoter proximal region sequence-specific DNA binding	11	6.32184	0.00162709	ELF1, HNRNPK, SMARCC2, SOX18, STAT1, NFYC, DDIT3, RUNX2, NFKB2, ETV6, FOSL2	159	359	17446	3.36199	0.393422	0.124639	0.122609
GOTERM_MF_DIRECT	GO:0001077~transcriptional activator activity, RNA polymerase II core promoter proximal region sequence-specific binding	9	5.17241	0.00324645	NR4A1, ELF1, HNRNPK, SOX18, NFYC, DDIT3, RUNX2, NFKB2, ETV6	159	270	17446	3.65744	0.631487	0.16611	0.163404
GOTERM_MF_DIRECT	GO:0044212~transcription regulatory region DNA binding	6	3.44828	0.0610152	SOX18, NFYC, DDIT3, SOX7, RUNX2, FOSL2	159	233	17446	2.82549	1	0.861125	0.8471
Annotation Cluster 3	Enrichment Score: 2.445072822245232
Category	Term	Count	%	PValue	Genes	List Total	Pop Hits	Pop Total	Fold Enrichment	Bonferroni	Benjamini	FDR
INTERPRO	IPR000421:Coagulation factor 5/8 C-terminal type domain	4	2.29885	0.000707656	DDR1, NRP2, CPXM2, DCBLD2	167	22	20594	22.4213	0.270225	0.314907	0.314907
SMART	SM00231:FA58C	4	2.29885	0.00114335	DDR1, NRP2, CPXM2, DCBLD2	111	20	10425	18.7838	0.126278	0.134915	0.134915
UP_SEQ_FEATURE	domain:F5/8 type C	3	1.72414	0.00633455	DDR1, CPXM2, DCBLD2	157	14	18012	24.5842	0.998389	1	1
INTERPRO	IPR008979:Galactose-binding domain-like	4	2.29885	0.0323587	DDR1, NRP2, CPXM2, DCBLD2	167	86	20594	5.73569	1	1	1
Annotation Cluster 4	Enrichment Score: 1.951176434245024
Category	Term	Count	%	PValue	Genes	List Total	Pop Hits	Pop Total	Fold Enrichment	Bonferroni	Benjamini	FDR
GOTERM_BP_DIRECT	GO:0098609~cell-cell adhesion	7	4.02299	0.00659455	GOLGA2, PDXDC1, EPB41L1, STAT1, ABI1, FSCN1, TMPO	160	189	18082	4.18565	0.999286	0.722103	0.720125
GOTERM_MF_DIRECT	GO:0098641~cadherin binding involved in cell-cell adhesion	8	4.5977	0.0137106	GOLGA2, HNRNPK, PDXDC1, EPB41L1, STAT1, ABI1, FSCN1, TMPO	159	279	17446	3.14619	0.985568	0.382651	0.376419
GOTERM_CC_DIRECT	GO:0005913~cell-cell adherens junction	8	4.5977	0.0154963	GOLGA2, HNRNPK, PDXDC1, EPB41L1, STAT1, ABI1, FSCN1, TMPO	162	316	19662	3.07267	0.981361	0.439062	0.433897
Annotation Cluster 5	Enrichment Score: 1.7769701949073222
Category	Term	Count	%	PValue	Genes	List Total	Pop Hits	Pop Total	Fold Enrichment	Bonferroni	Benjamini	FDR
INTERPRO	IPR020902:Actin/actin-like conserved site	3	1.72414	0.00551475	ACTA1, ACTR3B, ACTG1	167	14	20594	26.4251	0.914638	1	1
INTERPRO	IPR004000:Actin-related protein	3	1.72414	0.022738	ACTA1, ACTR3B, ACTG1	167	29	20594	12.757	0.999964	1	1
SMART	SM00268:ACTIN	3	1.72414	0.0372231	ACTA1, ACTR3B, ACTG1	111	29	10425	9.71575	0.988623	1	1
Annotation Cluster 6	Enrichment Score: 1.3094654140065851
Category	Term	Count	%	PValue	Genes	List Total	Pop Hits	Pop Total	Fold Enrichment	Bonferroni	Benjamini	FDR
GOTERM_BP_DIRECT	GO:0043161~proteasome-mediated ubiquitin-dependent protein catabolic process	8	4.5977	0.000351808	ABTB1, RNF44, KAT5, DDIT3, UBE2D3, WWP1, PPP2R5C, BTRC	160	149	18082	6.06779	0.319752	0.0550329	0.0548821
GOTERM_MF_DIRECT	GO:0061630~ubiquitin protein ligase activity	3	1.72414	0.540485	RNF44, WWP1, BTRC	159	199	17446	1.65412	1	1	0.986928
GOTERM_BP_DIRECT	GO:0016567~protein ubiquitination	4	2.29885	0.620175	RNF44, UBE2D3, WWP1, BTRC	160	362	18082	1.24876	1	1	0.998172
Annotation Cluster 7	Enrichment Score: 1.2326775606817248
Category	Term	Count	%	PValue	Genes	List Total	Pop Hits	Pop Total	Fold Enrichment	Bonferroni	Benjamini	FDR
UP_KEYWORDS	Neurogenesis	7	4.02299	0.0112657	TTLL7, NRP2, SMARCC2, LHX6, TNIK, CAMK2G, NES	172	247	22680	3.73694	0.909454	0.149271	0.140822
GOTERM_BP_DIRECT	GO:0007399~nervous system development	8	4.5977	0.0492965	TTLL7, NRP2, SMARCC2, LHX6, TNIK, CAMK2G, NES, HDAC7	160	377	18082	2.39814	1	1	0.998172
UP_KEYWORDS	Differentiation	7	4.02299	0.360903	TTLL7, SBNO2, NRP2, NOTCH4, LHX6, SIK1, CAMK2G	172	646	22680	1.42883	1	1	0.947867
Annotation Cluster 8	Enrichment Score: 1.196405163644431
Category	Term	Count	%	PValue	Genes	List Total	Pop Hits	Pop Total	Fold Enrichment	Bonferroni	Benjamini	FDR
GOTERM_MF_DIRECT	GO:0044822~poly(A) RNA binding	18	10.3448	0.0239821	RBM39, CPSF7, WDR36, CHTOP, RBM47, DDX24, TFRC, PPP1R10, TFB2M, UCHL5, MECP2, HNRNPK, XRN1, FSCN1, SNIP1, ARHGEF1, SSBP1, EIF4G3	159	1113	17446	1.7745	0.99942	0.566347	0.557124
UP_KEYWORDS	RNA-binding	10	5.74713	0.0389272	RBM39, CPSF7, RBM47, CHTOP, HNRNPK, DDX24, XRN1, PPP1R10, TFB2M, EIF4G3	172	601	22680	2.19402	0.999779	0.317406	0.29944
GOTERM_MF_DIRECT	GO:0003723~RNA binding	10	5.74713	0.275831	RBM39, CPSF7, RBM47, CHTOP, HNRNPK, DDX24, XRN1, PPP1R10, TFB2M, EIF4G3	159	780	17446	1.40671	1	1	0.986928
Annotation Cluster 9	Enrichment Score: 1.1543306649062688
Category	Term	Count	%	PValue	Genes	List Total	Pop Hits	Pop Total	Fold Enrichment	Bonferroni	Benjamini	FDR
UP_KEYWORDS	Nucleotide-binding	23	13.2184	0.0127444	DDR1, RASL11B, DDX24, UBE2D3, ABCC9, CDC42BPA, ACTR3B, RHOBTB1, GCK, ACTG1, TTN, CLK1, TTLL7, IKBKB, ACTA1, NADK2, MAT2A, PRKAR1A, WNK1, SIK1, TNIK, EIF2S3Y, CAMK2G	172	1754	22680	1.72907	0.934071	0.15893	0.149934
UP_KEYWORDS	ATP-binding	19	10.9195	0.0147649	DDR1, DDX24, UBE2D3, ABCC9, CDC42BPA, ACTR3B, GCK, ACTG1, TTN, CLK1, TTLL7, IKBKB, ACTA1, NADK2, MAT2A, WNK1, SIK1, TNIK, CAMK2G	172	1363	22680	1.83811	0.957297	0.171138	0.161451
UP_KEYWORDS	Kinase	12	6.89655	0.0185447	DDR1, IKBKB, CLK1, NADK2, WNK1, PRKAR1A, SIK1, TNIK, CDC42BPA, CAMK2G, GCK, TTN	172	707	22680	2.23808	0.981096	0.187213	0.176616
GOTERM_BP_DIRECT	GO:0046777~protein autophosphorylation	6	3.44828	0.0229422	DDR1, CLK1, WNK1, SIK1, TNIK, CAMK2G	160	183	18082	3.70533	1	1	0.998172
UP_KEYWORDS	Transferase	21	12.069	0.0245476	DDR1, GFPT2, UBE2D3, WWP1, GTDC1, TFB2M, CDC42BPA, GCK, TTN, CLK1, IKBKB, NADK2, KAT5, MAT2A, PRKAR1A, WNK1, KMT5B, ST3GAL6, SIK1, TNIK, CAMK2G	172	1654	22680	1.67417	0.994851	0.226265	0.213457
UP_SEQ_FEATURE	binding site:ATP	11	6.32184	0.0306125	DDR1, IKBKB, CLK1, MAT2A, WNK1, SIK1, TNIK, CDC42BPA, CAMK2G, GCK, TTN	157	583	18012	2.16464	1	1	1
UP_KEYWORDS	Serine/threonine-protein kinase	8	4.5977	0.0342989	IKBKB, CLK1, WNK1, SIK1, TNIK, CDC42BPA, CAMK2G, TTN	172	405	22680	2.60465	0.999388	0.290854	0.274391
GOTERM_MF_DIRECT	GO:0016301~kinase activity	12	6.89655	0.0429572	DDR1, IKBKB, CLK1, NADK2, CCND1, WNK1, PRKAR1A, SIK1, TNIK, CDC42BPA, CAMK2G, GCK	159	674	17446	1.95353	0.999999	0.778933	0.766247
GOTERM_MF_DIRECT	GO:0000166~nucleotide binding	26	14.9425	0.0431331	DDR1, RBM47, RASL11B, DDX24, UBE2D3, ACTR3B, RHOBTB1, ACTG1, ENOX2, IKBKB, NADK2, MAT2A, EIF2S3Y, CAMK2G, RBM39, CPSF7, ABCC9, CDC42BPA, GCK, CLK1, TTLL7, ACTA1, PRKAR1A, WNK1, SIK1, TNIK	159	1936	17446	1.47356	0.999999	0.778933	0.766247
GOTERM_MF_DIRECT	GO:0004672~protein kinase activity	10	5.74713	0.0526732	DDR1, IKBKB, CLK1, CCND1, WNK1, SIK1, TNIK, CDC42BPA, CAMK2G, TTN	159	531	17446	2.06635	1	0.861125	0.8471
INTERPRO	IPR008271:Serine/threonine-protein kinase, active site	7	4.02299	0.0532373	IKBKB, CLK1, WNK1, SIK1, TNIK, CDC42BPA, CAMK2G	167	333	20594	2.59226	1	1	1
INTERPRO	IPR000719:Protein kinase, catalytic domain	9	5.17241	0.0575077	DDR1, IKBKB, CLK1, WNK1, SIK1, TNIK, CDC42BPA, CAMK2G, TTN	167	515	20594	2.15506	1	1	1
GOTERM_BP_DIRECT	GO:0006468~protein phosphorylation	10	5.74713	0.0683277	DDR1, IKBKB, CLK1, CCND1, WNK1, PRKAR1A, SIK1, TNIK, CDC42BPA, CAMK2G	160	576	18082	1.96202	1	1	0.998172
UP_SEQ_FEATURE	domain:Protein kinase	9	5.17241	0.0708924	DDR1, IKBKB, CLK1, WNK1, SIK1, TNIK, CDC42BPA, CAMK2G, TTN	157	502	18012	2.05684	1	1	1
INTERPRO	IPR011009:Protein kinase-like domain	9	5.17241	0.0814454	DDR1, IKBKB, CLK1, WNK1, SIK1, TNIK, CDC42BPA, CAMK2G, TTN	167	556	20594	1.99614	1	1	1
GOTERM_MF_DIRECT	GO:0005524~ATP binding	20	11.4943	0.0880941	DDR1, DDX24, UBE2D3, ABCC9, CDC42BPA, ACTR3B, RUNX2, GCK, ACTG1, TTN, CLK1, TTLL7, IKBKB, ACTA1, NADK2, MAT2A, WNK1, SIK1, TNIK, CAMK2G	159	1507	17446	1.45618	1	1	0.986928
GOTERM_BP_DIRECT	GO:0016310~phosphorylation	10	5.74713	0.0913031	DDR1, IKBKB, CLK1, NADK2, WNK1, SIK1, TNIK, CDC42BPA, CAMK2G, GCK	160	612	18082	1.84661	1	1	0.998172
GOTERM_MF_DIRECT	GO:0004674~protein serine/threonine kinase activity	8	4.5977	0.0946466	IKBKB, CLK1, WNK1, SIK1, TNIK, CDC42BPA, CAMK2G, TTN	159	428	17446	2.0509	1	1	0.986928
GOTERM_MF_DIRECT	GO:0016740~transferase activity	19	10.9195	0.117799	DDR1, GFPT2, UBE2D3, WWP1, GTDC1, TFB2M, CDC42BPA, GCK, CLK1, IKBKB, NADK2, KAT5, MAT2A, WNK1, KMT5B, ST3GAL6, SIK1, TNIK, CAMK2G	159	1472	17446	1.41627	1	1	0.986928
SMART	SM00220:S_TKc	7	4.02299	0.21258	IKBKB, CLK1, WNK1, SIK1, TNIK, CDC42BPA, CAMK2G	111	380	10425	1.73009	1	1	1
UP_SEQ_FEATURE	nucleotide phosphate-binding region:ATP	12	6.89655	0.213504	DDR1, IKBKB, CLK1, MAT2A, DDX24, WNK1, SIK1, TNIK, CDC42BPA, CAMK2G, GCK, TTN	157	963	18012	1.42961	1	1	1
UP_SEQ_FEATURE	active site:Proton acceptor	9	5.17241	0.2738	DDR1, IKBKB, CLK1, WNK1, SIK1, TNIK, CDC42BPA, CAMK2G, TTN	157	710	18012	1.45427	1	1	1
GOTERM_MF_DIRECT	GO:0000287~magnesium ion binding	4	2.29885	0.277766	WNK1, SIK1, CDC42BPA, GCK	159	202	17446	2.17274	1	1	0.986928
INTERPRO	IPR017441:Protein kinase, ATP binding site	5	2.87356	0.392622	CLK1, SIK1, TNIK, CDC42BPA, CAMK2G	167	394	20594	1.56494	1	1	1
GOTERM_BP_DIRECT	GO:0035556~intracellular signal transduction	5	2.87356	0.468818	WNK1, SIK1, TNIK, CDC42BPA, SH2B3	160	400	18082	1.41266	1	1	0.998172
Annotation Cluster 10	Enrichment Score: 1.0876515081367681
Category	Term	Count	%	PValue	Genes	List Total	Pop Hits	Pop Total	Fold Enrichment	Bonferroni	Benjamini	FDR
UP_KEYWORDS	Metal-binding	36	20.6897	0.0314662	DDR1, NRP2, PPP1R10, ZBTB43, BRCC3, HDAC7, TTN, ADH1, CDH4, KAT5, MAT2A, MICAL1, PDE4B, ZFP280D, RUNX1T1, KLF10, RNF44, GSN, DTNB, ZFP1, CYB561A3, GM14296, CDC42BPA, ZFX, KLF2, NR4A1, MLLT10, CAPN11, ASPH, BCL6B, MTF2, LHX6, SIK1, MASP1, ASTN2, CRYAB	172	3395	22680	1.39823	0.998861	0.277951	0.262218
UP_KEYWORDS	Zinc	23	13.2184	0.0712399	KLF10, RNF44, ZFP1, DTNB, PPP1R10, ZBTB43, BRCC3, GM14296, CDC42BPA, ZFX, KLF2, HDAC7, NR4A1, MLLT10, ADH1, KAT5, BCL6B, MICAL1, MTF2, LHX6, ZFP280D, CRYAB, RUNX1T1	172	2099	22680	1.44487	1	0.447934	0.42258
UP_KEYWORDS	Zinc-finger	17	9.77011	0.132674	KLF10, RNF44, ZFP1, DTNB, PPP1R10, ZBTB43, GM14296, CDC42BPA, ZFX, KLF2, NR4A1, MLLT10, KAT5, BCL6B, MTF2, ZFP280D, RUNX1T1	172	1565	22680	1.43235	1	0.703171	0.663369
GOTERM_MF_DIRECT	GO:0046872~metal ion binding	37	21.2644	0.149983	DDR1, NRP2, PPP1R10, ZBTB43, BRCC3, HDAC7, ADH1, CDH4, KAT5, MAT2A, MICAL1, PDE4B, ZFP280D, RUNX1T1, KLF10, ZFP655, RNF44, GSN, DTNB, ZFP1, ZFP438, CYB561A3, GM14296, CDC42BPA, ZFX, KLF2, NR4A1, MLLT10, CAPN11, ASPH, BCL6B, MTF2, LHX6, SIK1, MASP1, ASTN2, CRYAB	159	3355	17446	1.21006	1	1	0.986928
Annotation Cluster 11	Enrichment Score: 1.0268774663378053
Category	Term	Count	%	PValue	Genes	List Total	Pop Hits	Pop Total	Fold Enrichment	Bonferroni	Benjamini	FDR
GOTERM_MF_DIRECT	GO:0005200~structural constituent of cytoskeleton	4	2.29885	0.0338461	EPB41L1, TPM2, ACTG1, TTN	159	78	17446	5.62683	0.999974	0.692821	0.681537
KEGG_PATHWAY	mmu05410:Hypertrophic cardiomyopathy (HCM)	3	1.72414	0.150661	TPM2, ACTG1, TTN	68	79	7691	4.29505	1	1	1
KEGG_PATHWAY	mmu05414:Dilated cardiomyopathy	3	1.72414	0.162876	TPM2, ACTG1, TTN	68	83	7691	4.08806	1	1	1
Annotation Cluster 12	Enrichment Score: 0.8508392700834214
Category	Term	Count	%	PValue	Genes	List Total	Pop Hits	Pop Total	Fold Enrichment	Bonferroni	Benjamini	FDR
UP_SEQ_FEATURE	zinc finger region:C2H2-type 2	7	4.02299	0.0293957	KLF10, ZFP1, BCL6B, ZBTB43, ZFP280D, ZFX, KLF2	157	268	18012	2.99658	1	1	1
UP_SEQ_FEATURE	zinc finger region:C2H2-type 1	6	3.44828	0.0788562	KLF10, ZFP1, BCL6B, ZFP280D, ZFX, KLF2	157	263	18012	2.61733	1	1	1
INTERPRO	IPR015880:Zinc finger, C2H2-like	10	5.74713	0.10856	KLF10, ZFP655, ZFP1, ZFP438, BCL6B, ZBTB43, GM14296, ZFP280D, ZFX, KLF2	167	693	20594	1.77947	1	1	1
UP_KEYWORDS	Zinc-finger	17	9.77011	0.132674	KLF10, RNF44, ZFP1, DTNB, PPP1R10, ZBTB43, GM14296, CDC42BPA, ZFX, KLF2, NR4A1, MLLT10, KAT5, BCL6B, MTF2, ZFP280D, RUNX1T1	172	1565	22680	1.43235	1	0.703171	0.663369
INTERPRO	IPR007087:Zinc finger, C2H2	10	5.74713	0.137166	KLF10, ZFP655, ZFP1, ZFP438, BCL6B, ZBTB43, GM14296, ZFP280D, ZFX, KLF2	167	731	20594	1.68697	1	1	1
GOTERM_MF_DIRECT	GO:0003676~nucleic acid binding	16	9.1954	0.152134	KLF10, ZFP655, RBM39, CPSF7, RBM47, ZFP1, DDX24, ZFP438, ZBTB43, GM14296, ZFX, KLF2, ENOX2, HNRNPK, XRN1, BCL6B	159	1237	17446	1.41922	1	1	0.986928
INTERPRO	IPR013087:Zinc finger C2H2-type/integrase DNA-binding domain	9	5.17241	0.157313	KLF10, ZFP655, ZFP1, ZFP438, BCL6B, ZBTB43, GM14296, ZFX, KLF2	167	652	20594	1.70223	1	1	1
UP_SEQ_FEATURE	zinc finger region:C2H2-type 3	5	2.87356	0.190915	KLF10, ZFP1, BCL6B, ZFX, KLF2	157	261	18012	2.19782	1	1	1
UP_SEQ_FEATURE	zinc finger region:C2H2-type 5	4	2.29885	0.236577	ZFP1, BCL6B, ZFP280D, ZFX	157	194	18012	2.36549	1	1	1
UP_SEQ_FEATURE	zinc finger region:C2H2-type 4	4	2.29885	0.286292	ZFP1, BCL6B, ZFP280D, ZFX	157	215	18012	2.13444	1	1	1
SMART	SM00355:ZnF_C2H2	10	5.74713	0.308557	KLF10, ZFP655, ZFP1, ZFP438, BCL6B, ZBTB43, GM14296, ZFP280D, ZFX, KLF2	111	693	10425	1.35525	1	1	1
Annotation Cluster 13	Enrichment Score: 0.8462490454667899
Category	Term	Count	%	PValue	Genes	List Total	Pop Hits	Pop Total	Fold Enrichment	Bonferroni	Benjamini	FDR
KEGG_PATHWAY	mmu04068:FoxO signaling pathway	5	2.87356	0.0290325	IKBKB, BCL2L11, CCND1, IRS1, KLF2	68	134	7691	4.22026	0.990486	1	1
KEGG_PATHWAY	mmu05206:MicroRNAs in cancer	6	3.44828	0.0918355	IKBKB, HNRNPK, BCL2L11, CCND1, IRS1, NOTCH4	68	276	7691	2.45876	1	1	1
KEGG_PATHWAY	mmu04932:Non-alcoholic fatty liver disease (NAFLD)	4	2.29885	0.156494	IKBKB, BCL2L11, IRS1, DDIT3	68	157	7691	2.8816	1	1	1
KEGG_PATHWAY	mmu04151:PI3K-Akt signaling pathway	6	3.44828	0.189936	IKBKB, NR4A1, BCL2L11, CCND1, IRS1, PPP2R5C	68	351	7691	1.93338	1	1	1
GOTERM_CC_DIRECT	GO:0043231~intracellular membrane-bounded organelle	6	3.44828	0.740889	IKBKB, BCL2L11, PDXDC1, TFRC, IRS1, GPBP1	162	751	19662	0.96967	1	1	0.992126
Annotation Cluster 14	Enrichment Score: 0.7880255492397116
Category	Term	Count	%	PValue	Genes	List Total	Pop Hits	Pop Total	Fold Enrichment	Bonferroni	Benjamini	FDR
UP_SEQ_FEATURE	repeat:ANK 1	5	2.87356	0.0867438	INVS, ABTB1, NOTCH4, NRARP, NFKB2	157	193	18012	2.97218	1	1	1
UP_SEQ_FEATURE	repeat:ANK 2	5	2.87356	0.0867438	INVS, ABTB1, NOTCH4, NRARP, NFKB2	157	193	18012	2.97218	1	1	1
UP_KEYWORDS	ANK repeat	5	2.87356	0.108462	INVS, ABTB1, NOTCH4, NRARP, NFKB2	172	240	22680	2.74709	1	0.638719	0.602565
INTERPRO	IPR002110:Ankyrin repeat	5	2.87356	0.11977	INVS, ABTB1, NOTCH4, NRARP, NFKB2	167	232	20594	2.6577	1	1	1
INTERPRO	IPR020683:Ankyrin repeat-containing domain	5	2.87356	0.132254	INVS, ABTB1, NOTCH4, NRARP, NFKB2	167	242	20594	2.54788	1	1	1
SMART	SM00248:ANK	5	2.87356	0.213725	INVS, ABTB1, NOTCH4, NRARP, NFKB2	111	225	10425	2.08709	1	1	1
UP_SEQ_FEATURE	repeat:ANK 5	3	1.72414	0.240296	INVS, NOTCH4, NFKB2	157	108	18012	3.18684	1	1	1
UP_SEQ_FEATURE	repeat:ANK 4	3	1.72414	0.301221	INVS, NOTCH4, NFKB2	157	127	18012	2.71007	1	1	1
UP_SEQ_FEATURE	repeat:ANK 3	3	1.72414	0.404365	INVS, NOTCH4, NFKB2	157	160	18012	2.15111	1	1	1
Annotation Cluster 15	Enrichment Score: 0.7772601782585326
Category	Term	Count	%	PValue	Genes	List Total	Pop Hits	Pop Total	Fold Enrichment	Bonferroni	Benjamini	FDR
UP_KEYWORDS	Developmental protein	13	7.47126	0.0661471	INVS, NRP2, NOTCH4, NRARP, TTLL7, HEY1, CUX1, LHX6, PLXNB2, SIK1, SPRY1, CAMK2G, NES	172	976	22680	1.75634	0.999999	0.438225	0.41342
GOTERM_BP_DIRECT	GO:0007275~multicellular organism development	13	7.47126	0.195127	INVS, NRP2, NOTCH4, NRARP, TTLL7, HEY1, CUX1, LHX6, PLXNB2, SIK1, SPRY1, CAMK2G, NES	160	1029	18082	1.42776	1	1	0.998172
UP_KEYWORDS	Differentiation	7	4.02299	0.360903	TTLL7, SBNO2, NRP2, NOTCH4, LHX6, SIK1, CAMK2G	172	646	22680	1.42883	1	1	0.947867
Annotation Cluster 16	Enrichment Score: 0.7574859101298143
Category	Term	Count	%	PValue	Genes	List Total	Pop Hits	Pop Total	Fold Enrichment	Bonferroni	Benjamini	FDR
UP_SEQ_FEATURE	repeat:TPR 3	4	2.29885	0.0946716	ASPH, KLC1, FKBP5, TTN	157	125	18012	3.67124	1	1	1
UP_KEYWORDS	TPR repeat	4	2.29885	0.0954498	ASPH, KLC1, FKBP5, TTN	172	144	22680	3.66279	1	0.578153	0.545428
UP_SEQ_FEATURE	repeat:TPR 5	3	1.72414	0.106214	ASPH, KLC1, TTN	157	64	18012	5.37779	1	1	1
UP_SEQ_FEATURE	repeat:TPR 1	4	2.29885	0.116249	ASPH, KLC1, FKBP5, TTN	157	137	18012	3.34967	1	1	1
UP_SEQ_FEATURE	repeat:TPR 2	4	2.29885	0.116249	ASPH, KLC1, FKBP5, TTN	157	137	18012	3.34967	1	1	1
UP_SEQ_FEATURE	repeat:TPR 4	3	1.72414	0.17091	ASPH, KLC1, TTN	157	86	18012	4.00207	1	1	1
INTERPRO	IPR013026:Tetratricopeptide repeat-containing domain	3	1.72414	0.252107	ASPH, KLC1, FKBP5	167	120	20594	3.08293	1	1	1
INTERPRO	IPR019734:Tetratricopeptide repeat	3	1.72414	0.270022	ASPH, KLC1, FKBP5	167	126	20594	2.93613	1	1	1
SMART	SM00028:TPR	3	1.72414	0.358369	ASPH, KLC1, FKBP5	111	119	10425	2.3677	1	1	1
INTERPRO	IPR011990:Tetratricopeptide-like helical	3	1.72414	0.492162	ASPH, KLC1, FKBP5	167	204	20594	1.81349	1	1	1
Annotation Cluster 17	Enrichment Score: 0.7571120321772477
Category	Term	Count	%	PValue	Genes	List Total	Pop Hits	Pop Total	Fold Enrichment	Bonferroni	Benjamini	FDR
INTERPRO	IPR000210:BTB/POZ-like	5	2.87356	0.106236	ABTB1, BCL6B, ZBTB43, KCNRG, RHOBTB1	167	222	20594	2.77742	1	1	1
INTERPRO	IPR011333:BTB/POZ fold	5	2.87356	0.11977	ABTB1, BCL6B, ZBTB43, KCNRG, RHOBTB1	167	232	20594	2.6577	1	1	1
SMART	SM00225:BTB	5	2.87356	0.198396	ABTB1, BCL6B, ZBTB43, KCNRG, RHOBTB1	111	218	10425	2.1541	1	1	1
UP_SEQ_FEATURE	domain:BTB	3	1.72414	0.371023	BCL6B, ZBTB43, KCNRG	157	149	18012	2.30992	1	1	1
Annotation Cluster 18	Enrichment Score: 0.7357447849294447
Category	Term	Count	%	PValue	Genes	List Total	Pop Hits	Pop Total	Fold Enrichment	Bonferroni	Benjamini	FDR
UP_KEYWORDS	Sodium transport	4	2.29885	0.0540671	SLC4A7, SLC38A10, SLC17A7, SCN4B	172	113	22680	4.66763	0.999992	0.382074	0.360447
UP_KEYWORDS	Sodium	4	2.29885	0.0624726	SLC4A7, SLC38A10, SLC17A7, SCN4B	172	120	22680	4.39535	0.999999	0.427232	0.403049
GOTERM_BP_DIRECT	GO:0006814~sodium ion transport	4	2.29885	0.0962138	SLC4A7, SLC38A10, SLC17A7, SCN4B	160	124	18082	3.64556	1	1	0.998172
GOTERM_BP_DIRECT	GO:0006811~ion transport	5	2.87356	0.759343	SLC4A7, WNK1, SLC38A10, SLC17A7, SCN4B	160	584	18082	0.967573	1	1	0.998172
UP_KEYWORDS	Ion transport	4	2.29885	0.849137	SLC4A7, SLC38A10, SLC17A7, SCN4B	172	619	22680	0.852087	1	1	0.947867
Annotation Cluster 19	Enrichment Score: 0.7337667005683595
Category	Term	Count	%	PValue	Genes	List Total	Pop Hits	Pop Total	Fold Enrichment	Bonferroni	Benjamini	FDR
GOTERM_CC_DIRECT	GO:0016023~cytoplasmic, membrane-bounded vesicle	4	2.29885	0.126194	TFRC, RIN3, KLC1, SENP2	162	151	19662	3.21511	1	1	0.992126
GOTERM_CC_DIRECT	GO:0031410~cytoplasmic vesicle	9	5.17241	0.16115	SLC4A7, CAPN11, TFRC, NOTCH4, SLC17A7, RIN3, KLC1, SENP2, ASTN2	162	646	19662	1.69092	1	1	0.992126
UP_KEYWORDS	Cytoplasmic vesicle	6	3.44828	0.309336	CAPN11, SLC17A7, RIN3, KLC1, SENP2, ASTN2	172	489	22680	1.61792	1	1	0.947867
Annotation Cluster 20	Enrichment Score: 0.6925028507382994
Category	Term	Count	%	PValue	Genes	List Total	Pop Hits	Pop Total	Fold Enrichment	Bonferroni	Benjamini	FDR
UP_KEYWORDS	SH2 domain	3	1.72414	0.187749	STAT1, RIN3, SH2B3	172	105	22680	3.76744	1	0.925646	0.873251
UP_SEQ_FEATURE	domain:SH2	3	1.72414	0.192674	STAT1, RIN3, SH2B3	157	93	18012	3.70084	1	1	1
INTERPRO	IPR000980:SH2 domain	3	1.72414	0.231255	STAT1, RIN3, SH2B3	167	113	20594	3.27391	1	1	1
Annotation Cluster 21	Enrichment Score: 0.5722936324828788
Category	Term	Count	%	PValue	Genes	List Total	Pop Hits	Pop Total	Fold Enrichment	Bonferroni	Benjamini	FDR
INTERPRO	IPR001849:Pleckstrin homology domain	5	2.87356	0.161897	ARHGAP9, IRS1, ARHGEF1, CDC42BPA, SH2B3	167	262	20594	2.35338	1	1	1
INTERPRO	IPR011993:Pleckstrin homology-like domain	6	3.44828	0.234988	ARHGAP9, EPB41L1, IRS1, ARHGEF1, CDC42BPA, SH2B3	167	409	20594	1.80906	1	1	1
UP_SEQ_FEATURE	domain:PH	4	2.29885	0.269175	IRS1, ARHGEF1, CDC42BPA, SH2B3	157	208	18012	2.20627	1	1	1
SMART	SM00233:PH	4	2.29885	0.501773	ARHGAP9, IRS1, ARHGEF1, CDC42BPA	111	253	10425	1.48488	1	1	1
Annotation Cluster 22	Enrichment Score: 0.5666806449752173
Category	Term	Count	%	PValue	Genes	List Total	Pop Hits	Pop Total	Fold Enrichment	Bonferroni	Benjamini	FDR
KEGG_PATHWAY	mmu05212:Pancreatic cancer	3	1.72414	0.109694	IKBKB, CCND1, STAT1	68	65	7691	5.22014	1	1	1
KEGG_PATHWAY	mmu05200:Pathways in cancer	6	3.44828	0.260116	IKBKB, CCND1, STAT1, ARHGEF1, NFKB2, RUNX1T1	68	395	7691	1.71802	1	1	1
KEGG_PATHWAY	mmu05161:Hepatitis B	3	1.72414	0.364503	IKBKB, CCND1, STAT1	68	146	7691	2.32403	1	1	1
GOTERM_BP_DIRECT	GO:0008284~positive regulation of cell proliferation	6	3.44828	0.520266	IKBKB, MECP2, CHTOP, CCND1, STAT1, RUNX2	160	542	18082	1.25106	1	1	0.998172
Annotation Cluster 23	Enrichment Score: 0.4873013258147315
Category	Term	Count	%	PValue	Genes	List Total	Pop Hits	Pop Total	Fold Enrichment	Bonferroni	Benjamini	FDR
UP_KEYWORDS	WD repeat	5	2.87356	0.128708	WDR36, MED16, BTRC, EML1, TTN	172	256	22680	2.5754	1	0.699642	0.66004
INTERPRO	IPR015943:WD40/YVTN repeat-like-containing domain	5	2.87356	0.294143	WDR36, PLXNB2, MED16, BTRC, EML1	167	340	20594	1.81349	1	1	1
INTERPRO	IPR001680:WD40 repeat	4	2.29885	0.355937	WDR36, MED16, BTRC, EML1	167	263	20594	1.87555	1	1	1
INTERPRO	IPR019775:WD40 repeat, conserved site	3	1.72414	0.373306	WDR36, BTRC, EML1	167	161	20594	2.29784	1	1	1
INTERPRO	IPR017986:WD40-repeat-containing domain	4	2.29885	0.45097	WDR36, MED16, BTRC, EML1	167	307	20594	1.60674	1	1	1
SMART	SM00320:WD40	4	2.29885	0.525344	WDR36, MED16, BTRC, EML1	111	262	10425	1.43388	1	1	1
Annotation Cluster 24	Enrichment Score: 0.47091975297438554
Category	Term	Count	%	PValue	Genes	List Total	Pop Hits	Pop Total	Fold Enrichment	Bonferroni	Benjamini	FDR
UP_KEYWORDS	Endosome	6	3.44828	0.243058	GRIPAP1, UBE2D3, RIN3, TNIK, CYB561A3, ASTN2	172	443	22680	1.78592	1	1	0.947867
GOTERM_CC_DIRECT	GO:0005768~endosome	7	4.02299	0.287585	GRIPAP1, TFRC, UBE2D3, RIN3, TNIK, CYB561A3, ASTN2	162	544	19662	1.56175	1	1	0.992126
GOTERM_CC_DIRECT	GO:0005769~early endosome	3	1.72414	0.553049	GRIPAP1, RIN3, ASTN2	162	226	19662	1.61111	1	1	0.992126
Annotation Cluster 25	Enrichment Score: 0.4503189541752596
Category	Term	Count	%	PValue	Genes	List Total	Pop Hits	Pop Total	Fold Enrichment	Bonferroni	Benjamini	FDR
KEGG_PATHWAY	mmu04120:Ubiquitin mediated proteolysis	4	2.29885	0.126284	UBE2D3, WWP1, BTRC, RHOBTB1	68	142	7691	3.186	1	1	1
GOTERM_MF_DIRECT	GO:0004842~ubiquitin-protein transferase activity	4	2.29885	0.569088	UBE2D3, WWP1, FBXO3, BTRC	159	326	17446	1.3463	1	1	0.986928
GOTERM_BP_DIRECT	GO:0016567~protein ubiquitination	4	2.29885	0.620175	RNF44, UBE2D3, WWP1, BTRC	160	362	18082	1.24876	1	1	0.998172
Annotation Cluster 26	Enrichment Score: 0.42466164096331294
Category	Term	Count	%	PValue	Genes	List Total	Pop Hits	Pop Total	Fold Enrichment	Bonferroni	Benjamini	FDR
INTERPRO	IPR000504:RNA recognition motif domain	4	2.29885	0.308492	ENOX2, RBM39, CPSF7, RBM47	167	241	20594	2.04676	1	1	1
INTERPRO	IPR012677:Nucleotide-binding, alpha-beta plait	4	2.29885	0.395355	ENOX2, RBM39, CPSF7, RBM47	167	281	20594	1.75541	1	1	1
SMART	SM00360:RRM	4	2.29885	0.436298	ENOX2, RBM39, CPSF7, RBM47	111	229	10425	1.64051	1	1	1
Annotation Cluster 27	Enrichment Score: 0.3932482582044524
Category	Term	Count	%	PValue	Genes	List Total	Pop Hits	Pop Total	Fold Enrichment	Bonferroni	Benjamini	FDR
INTERPRO	IPR009057:Homeodomain-like	5	2.87356	0.303184	SMARCC2, CUX1, SATB1, PBX3, LHX6	167	345	20594	1.78721	1	1	1
UP_KEYWORDS	Homeobox	4	2.29885	0.353324	CUX1, SATB1, PBX3, LHX6	172	280	22680	1.88372	1	1	0.947867
INTERPRO	IPR001356:Homeodomain	4	2.29885	0.373611	CUX1, SATB1, PBX3, LHX6	167	271	20594	1.82018	1	1	1
INTERPRO	IPR017970:Homeobox, conserved site	3	1.72414	0.437434	CUX1, PBX3, LHX6	167	184	20594	2.01061	1	1	1
UP_SEQ_FEATURE	DNA-binding region:Homeobox	3	1.72414	0.466055	CUX1, SATB1, LHX6	157	180	18012	1.9121	1	1	1
SMART	SM00389:HOX	4	2.29885	0.535627	CUX1, SATB1, PBX3, LHX6	111	266	10425	1.41231	1	1	1
Annotation Cluster 28	Enrichment Score: 0.36914278573978715
Category	Term	Count	%	PValue	Genes	List Total	Pop Hits	Pop Total	Fold Enrichment	Bonferroni	Benjamini	FDR
UP_KEYWORDS	Protease	7	4.02299	0.226179	RHBDF1, CAPN11, CPXM2, MASP1, BRCC3, SENP2, UCHL5	172	542	22680	1.70299	1	1	0.947867
UP_KEYWORDS	Thiol protease	3	1.72414	0.268051	CAPN11, SENP2, UCHL5	172	134	22680	2.9521	1	1	0.947867
GOTERM_MF_DIRECT	GO:0008234~cysteine-type peptidase activity	3	1.72414	0.362077	CAPN11, SENP2, UCHL5	159	141	17446	2.33454	1	1	0.986928
GOTERM_BP_DIRECT	GO:0006508~proteolysis	7	4.02299	0.405071	RHBDF1, CAPN11, CPXM2, MASP1, BRCC3, SENP2, UCHL5	160	582	18082	1.35926	1	1	0.998172
UP_KEYWORDS	Hydrolase	14	8.04598	0.472741	RHBDF1, DDX24, CPXM2, CTDSPL2, BRCC3, SENP2, UCHL5, HDAC7, CAPN11, XRN1, PDE4B, MASP1, MEST, LPIN3	172	1646	22680	1.12153	1	1	0.947867
GOTERM_MF_DIRECT	GO:0008233~peptidase activity	5	2.87356	0.691266	CAPN11, MASP1, BRCC3, SENP2, UCHL5	159	516	17446	1.06321	1	1	0.986928
GOTERM_MF_DIRECT	GO:0016787~hydrolase activity	11	6.32184	0.896868	CAPN11, DDX24, XRN1, MASP1, CTDSPL2, BRCC3, SENP2, MEST, LPIN3, UCHL5, HDAC7	159	1533	17446	0.787316	1	1	0.986928
Annotation Cluster 29	Enrichment Score: 0.3559548504249127
Category	Term	Count	%	PValue	Genes	List Total	Pop Hits	Pop Total	Fold Enrichment	Bonferroni	Benjamini	FDR
UP_KEYWORDS	Cell cycle	8	4.5977	0.194944	GOLGA2, RGS2, CCND1, DDIT3, TXNIP, CEP250, SIK1, BRCC3	172	626	22680	1.68512	1	0.939277	0.886111
GOTERM_BP_DIRECT	GO:0007049~cell cycle	8	4.5977	0.296095	GOLGA2, RGS2, CCND1, DDIT3, TXNIP, CEP250, SIK1, BRCC3	160	614	18082	1.47248	1	1	0.998172
UP_KEYWORDS	Cell division	3	1.72414	0.773411	GOLGA2, CCND1, BRCC3	172	372	22680	1.06339	1	1	0.947867
GOTERM_BP_DIRECT	GO:0051301~cell division	3	1.72414	0.844167	GOLGA2, CCND1, BRCC3	160	374	18082	0.906517	1	1	0.998172
Annotation Cluster 30	Enrichment Score: 0.32911176020402905
Category	Term	Count	%	PValue	Genes	List Total	Pop Hits	Pop Total	Fold Enrichment	Bonferroni	Benjamini	FDR
UP_KEYWORDS	WD repeat	5	2.87356	0.128708	WDR36, MED16, BTRC, EML1, TTN	172	256	22680	2.5754	1	0.699642	0.66004
UP_SEQ_FEATURE	repeat:WD 5	3	1.72414	0.548407	MED16, EML1, TTN	157	211	18012	1.63118	1	1	1
UP_SEQ_FEATURE	repeat:WD 4	3	1.72414	0.594723	MED16, EML1, TTN	157	230	18012	1.49643	1	1	1
UP_SEQ_FEATURE	repeat:WD 3	3	1.72414	0.624715	MED16, EML1, TTN	157	243	18012	1.41637	1	1	1
UP_SEQ_FEATURE	repeat:WD 1	3	1.72414	0.635788	MED16, EML1, TTN	157	248	18012	1.38782	1	1	1
UP_SEQ_FEATURE	repeat:WD 2	3	1.72414	0.635788	MED16, EML1, TTN	157	248	18012	1.38782	1	1	1
Annotation Cluster 31	Enrichment Score: 0.2600529028212032
Category	Term	Count	%	PValue	Genes	List Total	Pop Hits	Pop Total	Fold Enrichment	Bonferroni	Benjamini	FDR
UP_KEYWORDS	Ubl conjugation pathway	8	4.5977	0.200172	FBXO38, UBE2D3, WWP1, FBXO3, BRCC3, SENP2, BTRC, UCHL5	172	631	22680	1.67177	1	0.94087	0.887614
UP_KEYWORDS	DNA repair	3	1.72414	0.624122	UBE2D3, BRCC3, UCHL5	172	279	22680	1.41785	1	1	0.947867
GOTERM_BP_DIRECT	GO:0006974~cellular response to DNA damage stimulus	4	2.29885	0.718046	CCND1, UBE2D3, BRCC3, UCHL5	160	420	18082	1.07631	1	1	0.998172
UP_KEYWORDS	DNA damage	3	1.72414	0.722935	UBE2D3, BRCC3, UCHL5	172	336	22680	1.17733	1	1	0.947867
GOTERM_BP_DIRECT	GO:0006281~DNA repair	3	1.72414	0.772343	UBE2D3, BRCC3, UCHL5	160	318	18082	1.06616	1	1	0.998172
Annotation Cluster 32	Enrichment Score: 0.13904512884065715
Category	Term	Count	%	PValue	Genes	List Total	Pop Hits	Pop Total	Fold Enrichment	Bonferroni	Benjamini	FDR
GOTERM_MF_DIRECT	GO:0005525~GTP binding	4	2.29885	0.677614	RASL11B, IGTP, EIF2S3Y, RHOBTB1	159	383	17446	1.14593	1	1	0.986928
UP_KEYWORDS	GTP-binding	3	1.72414	0.71678	RASL11B, EIF2S3Y, RHOBTB1	172	332	22680	1.19151	1	1	0.947867
INTERPRO	IPR027417:P-loop containing nucleoside triphosphate hydrolase	7	4.02299	0.746261	SBNO2, DDX24, RASL11B, IGTP, ABCC9, EIF2S3Y, RHOBTB1	167	909	20594	0.949639	1	1	1
UP_SEQ_FEATURE	nucleotide phosphate-binding region:GTP	3	1.72414	0.766585	RASL11B, EIF2S3Y, RHOBTB1	157	319	18012	1.07893	1	1	1
Annotation Cluster 33	Enrichment Score: 0.10450189783075275
Category	Term	Count	%	PValue	Genes	List Total	Pop Hits	Pop Total	Fold Enrichment	Bonferroni	Benjamini	FDR
UP_KEYWORDS	Oxidoreductase	5	2.87356	0.713413	ENOX2, ADH1, ASPH, MICAL1, CYB561A3	172	639	22680	1.03177	1	1	0.947867
GOTERM_MF_DIRECT	GO:0016491~oxidoreductase activity	5	2.87356	0.801152	ENOX2, ADH1, ASPH, MICAL1, CYB561A3	159	604	17446	0.908305	1	1	0.986928
GOTERM_BP_DIRECT	GO:0055114~oxidation-reduction process	5	2.87356	0.850038	ENOX2, ADH1, ASPH, MICAL1, CYB561A3	160	676	18082	0.835891	1	1	0.998172
Annotation Cluster 34	Enrichment Score: 0.07065374239865312
Category	Term	Count	%	PValue	Genes	List Total	Pop Hits	Pop Total	Fold Enrichment	Bonferroni	Benjamini	FDR
UP_KEYWORDS	Immunoglobulin domain	4	2.29885	0.706052	ILDR2, LRIG2, SCN4B, TTN	172	481	22680	1.09655	1	1	0.947867
INTERPRO	IPR003599:Immunoglobulin subtype	4	2.29885	0.791358	ILDR2, LRIG2, SCN4B, TTN	167	518	20594	0.952258	1	1	1
INTERPRO	IPR013783:Immunoglobulin-like fold	7	4.02299	0.883185	ILDR2, PLXNB2, LRIG2, ASTN2, SCN4B, NFKB2, TTN	167	1099	20594	0.785461	1	1	1
SMART	SM00409:IG	4	2.29885	0.916077	ILDR2, LRIG2, SCN4B, TTN	111	518	10425	0.725243	1	1	1
INTERPRO	IPR007110:Immunoglobulin-like domain	4	2.29885	0.980704	ILDR2, LRIG2, SCN4B, TTN	167	920	20594	0.536162	1	1	1
Annotation Cluster 35	Enrichment Score: 0.039731887730613875
Category	Term	Count	%	PValue	Genes	List Total	Pop Hits	Pop Total	Fold Enrichment	Bonferroni	Benjamini	FDR
UP_KEYWORDS	Disulfide bond	26	14.9425	0.406737	DDR1, NRP2, OLFML2B, TFRC, CPXM2, NOTCH4, MTTP, UBE2D3, ILDR2, TXNDC11, TTN, NPPB, OLFR78, CUX1, LRIG2, PRND, GSN, DCBLD2, SLC4A7, ASPH, PRKAR1A, TXNIP, PLXNB2, MASP1, ASTN2, SCN4B	172	3124	22680	1.09743	1	1	0.947867
UP_KEYWORDS	Glycoprotein	25	14.3678	0.861065	DDR1, NRP2, OLFML2B, TFRC, CPXM2, NOTCH4, ENOX2, CDH4, OLFR78, ST3GAL6, LRIG2, PRND, MEST, SLC36A4, RHBDF1, ABCC9, CYB561A3, DCBLD2, SLC4A7, HNRNPK, ASPH, PLXNB2, MASP1, ASTN2, SCN4B	172	3815	22680	0.864092	1	1	0.947867
UP_SEQ_FEATURE	disulfide bond	17	9.77011	0.931252	DDR1, NRP2, OLFML2B, GSN, TFRC, CPXM2, NOTCH4, TXNDC11, DCBLD2, TTN, NPPB, PRKAR1A, LRIG2, MASP1, ASTN2, PRND, SCN4B	157	2510	18012	0.777029	1	1	1
UP_KEYWORDS	Membrane	56	32.1839	0.959619	DDR1, INVS, ERRFI1, NRP2, TFRC, UBE2D3, TXNDC11, PEX26, IKBKB, GOLGA2, CDH4, RGS2, OLFR78, CCND1, BBS9, PRND, TMPO, RHBDF1, ABCC9, CYB561A3, SENP2, ASPH, PRKAR1A, CDIP1, ARHGEF1, ASTN2, SCN4B, TMEM185A, TMEM254A, NOTCH4, ILDR2, SLC38A10, AKAP5, ENOX2, TRP53I11, BCL2L11, CUX1, SLC17A7, MBP, ST3GAL6, LRIG2, MEST, CAMK2G, SLC36A4, PIRT, RUNX1T1, CHTOP, WWP1, DCBLD2, SLC4A7, SLC2A9, MLLT10, ABI1, PLX…	172	8683	22680	0.850419	1	1	0.959619
UP_SEQ_FEATURE	topological domain:Cytoplasmic	16	9.1954	0.992324	DDR1, RHBDF1, NRP2, TFRC, NOTCH4, ABCC9, DCBLD2, PEX26, SLC4A7, CDH4, ASPH, CUX1, SLC17A7, ST3GAL6, ASTN2, SCN4B	157	2880	18012	0.637367	1	1	1
UP_KEYWORDS	Signal	23	13.2184	0.99481	DDR1, NDRG4, NRP2, OLFML2B, GSN, CPXM2, NOTCH4, MTTP, ILDR2, DCBLD2, NPPB, CDH4, BCL2L11, ASPH, WNK1, PLXNB2, ARHGEF1, LRIG2, MASP1, ASTN2, PRND, MEST, SCN4B	172	4543	22680	0.667574	1	1	0.99481
UP_SEQ_FEATURE	glycosylation site:N-linked (GlcNAc...)	20	11.4943	0.995694	DDR1, RHBDF1, NRP2, OLFML2B, TFRC, CPXM2, NOTCH4, ABCC9, DCBLD2, SLC4A7, CDH4, ASPH, ST3GAL6, LRIG2, MASP1, ASTN2, PRND, MEST, SLC36A4, SCN4B	157	3563	18012	0.643986	1	1	1
UP_SEQ_FEATURE	topological domain:Extracellular	11	6.32184	0.995841	DDR1, SLC4A7, CDH4, NRP2, TFRC, NOTCH4, SLC17A7, ABCC9, ASTN2, SCN4B, DCBLD2	157	2256	18012	0.559392	1	1	1
UP_SEQ_FEATURE	transmembrane region	25	14.3678	0.996799	DDR1, NRP2, TFRC, TMEM254A, NOTCH4, TXNDC11, SLC38A10, PEX26, CDH4, CUX1, SLC17A7, ST3GAL6, LRIG2, MEST, SLC36A4, PIRT, TMPO, RHBDF1, ABCC9, CYB561A3, DCBLD2, SLC4A7, ASPH, ASTN2, SCN4B	157	4312	18012	0.665156	1	1	1
UP_KEYWORDS	Transmembrane helix	36	20.6897	0.998937	DDR1, TMEM185A, NRP2, TFRC, TMEM254A, NOTCH4, ILDR2, TXNDC11, SLC38A10, PEX26, TRP53I11, CDH4, OLFR78, CUX1, SLC17A7, ST3GAL6, LRIG2, MEST, SLC36A4, PIRT, TMPO, RUNX1T1, RHBDF1, CHTOP, ABCC9, CYB561A3, DCBLD2, SLC4A7, SLC2A9, MLLT10, ASPH, CDIP1, PLXNB2, ASTN2, LRCH4, SCN4B	172	6938	22680	0.6842	1	1	0.998937
UP_KEYWORDS	Transmembrane	36	20.6897	0.999008	DDR1, TMEM185A, NRP2, TFRC, TMEM254A, NOTCH4, ILDR2, TXNDC11, SLC38A10, PEX26, TRP53I11, CDH4, OLFR78, CUX1, SLC17A7, ST3GAL6, LRIG2, MEST, SLC36A4, PIRT, TMPO, RUNX1T1, RHBDF1, CHTOP, ABCC9, CYB561A3, DCBLD2, SLC4A7, SLC2A9, MLLT10, ASPH, CDIP1, PLXNB2, ASTN2, LRCH4, SCN4B	172	6955	22680	0.682527	1	1	0.999008
UP_SEQ_FEATURE	signal peptide	15	8.62069	0.99904	DDR1, NRP2, OLFML2B, GSN, CPXM2, NOTCH4, MTTP, DCBLD2, NPPB, CDH4, LRIG2, MASP1, ASTN2, PRND, SCN4B	157	3124	18012	0.550862	1	1	1
GOTERM_CC_DIRECT	GO:0016021~integral component of membrane	36	20.6897	0.999914	DDR1, TMEM185A, NRP2, TFRC, TMEM254A, NOTCH4, ILDR2, TXNDC11, SLC38A10, PEX26, TRP53I11, CDH4, OLFR78, CUX1, SLC17A7, ST3GAL6, LRIG2, MEST, SLC36A4, PIRT, TMPO, RUNX1T1, RHBDF1, CHTOP, ABCC9, CYB561A3, DCBLD2, SLC4A7, SLC2A9, MLLT10, ASPH, CDIP1, PLXNB2, ASTN2, LRCH4, SCN4B	162	6878	19662	0.635262	1	1	0.999914
Annotation Cluster 36	Enrichment Score: 0.020206909887753834
Category	Term	Count	%	PValue	Genes	List Total	Pop Hits	Pop Total	Fold Enrichment	Bonferroni	Benjamini	FDR
GOTERM_CC_DIRECT	GO:0005615~extracellular space	10	5.74713	0.875532	DDR1, MECP2, ENOX2, NPPB, ACTA1, GSN, TFRC, CPXM2, MASP1, ACTG1	162	1504	19662	0.806984	1	1	0.992126
UP_KEYWORDS	Secreted	6	3.44828	0.996469	ENOX2, NPPB, OLFML2B, GSN, CPXM2, MASP1	172	1685	22680	0.469533	1	1	0.996469
GOTERM_CC_DIRECT	GO:0005576~extracellular region	7	4.02299	0.996881	ENOX2, NPPB, OLFML2B, GSN, TFRC, CPXM2, MASP1	162	1753	19662	0.484651	1	1	0.996881

## Sheet: b) Ingenuity Pathways
Table S6b. Summary of IPA Pathway Analyses in CONV Mice following IHH Treatment
b) Ingenuity Canonical Pathways:
Ingenuity Canonical Pathways	p-value	Ratio	z-score	Molecules
Myc Mediated Apoptosis Signaling	0.00251189	0.0851	1	BCL2L11,IKBKB,NFKB2,PRKAR1A
Coronavirus Pathogenesis Pathway	0.00301995	0.0513	-0.816	BCL2L11,CCND1,DDIT3,IKBKB,NFKB2,STAT1
IL-9 Signaling	0.00380189	0.115		IRS1,NFKB2,STAT1
Role of JAK2 in Hormone-like Cytokine Signaling	0.00562341	0.1		IRS1,SH2B3,STAT1
Calcium Signaling	0.00870964	0.0414		ACTA1,ASPH,CAMK2G,HDAC7,PRKAR1A,Tpm2
Adipogenesis pathway	0.0102329	0.0463		DDIT3,HDAC7,RUNX1T1,SENP2,TXNIP
Apelin Pancreas Signaling Pathway	0.0109648	0.0789		DDIT3,NFKB2,PRKAR1A
MSP-RON Signaling In Macrophages Pathway	0.0125893	0.0541	0	IKBKB,NFKB2,SBNO2,STAT1
Role of JAK1, JAK2 and TYK2 in Interferon Signaling	0.0141254	0.133		NFKB2,STAT1
Maturity Onset Diabetes of Young (MODY) Signaling	0.0154882	0.0698		ABCC9,GCK,NFKB2
iNOS Signaling	0.0154882	0.0698		IKBKB,NFKB2,STAT1
Activation of IRF by Cytosolic Pattern Recognition Receptors	0.0162181	0.0682		IKBKB,NFKB2,STAT1
Insulin Secretion Signaling Pathway	0.0186209	0.0349	1.342	ABCC9,CAMK2G,EIF4G3,GCK,PRKAR1A,STAT1
Chronic Myeloid Leukemia Signaling	0.0194984	0.0476		CCND1,HDAC7,IKBKB,NFKB2
RhoA Signaling	0.0218776	0.046		ACTA1,ARHGEF1,NRP2,TTN
Kinetochore Metaphase Signaling Pathway	0.0229087	0.06		KAT5,PPP1R10,Ppp2r5c
IL-15 Production	0.0234423	0.0449	1	CLK1,DDR1,NFKB2,STAT1
Crosstalk between Dendritic Cells and Natural Killer Cells	0.0281838	0.0556		ACTA1,CAMK2G,NFKB2
Cell Cycle: G1/S Checkpoint Regulation	0.0323594	0.0526		BTRC,CCND1,HDAC7
Molecular Mechanisms of Cancer	0.0338844	0.0261		ARHGEF1,BCL2L11,CAMK2G,CCND1,IRS1,NFKB2,PRKAR1A,RHOBTB1
Production of Nitric Oxide and Reactive Oxygen Species in Macrophages	0.0346737	0.0338	0	IKBKB,NFKB2,PPP1R10,RHOBTB1,STAT1
Trehalose Degradation II (Trehalase)	0.0363078	0.333		GCK
UDP-N-acetyl-D-glucosamine Biosynthesis II	0.0363078	0.333		GFPT2
S-adenosyl-L-methionine Biosynthesis	0.0363078	0.333		MAT2A
Small Cell Lung Cancer Signaling	0.0371535	0.05		CCND1,IKBKB,NFKB2
GM-CSF Signaling	0.0371535	0.05		CAMK2G,CCND1,STAT1
PI3K Signaling in B Lymphocytes	0.0380189	0.0385		CAMK2G,IKBKB,IRS1,NFKB2
Thrombin Signaling	0.0389045	0.0327	0	ARHGEF1,CAMK2G,IKBKB,NFKB2,RHOBTB1
Role of RIG1-like Receptors in Antiviral Innate Immunity	0.0398107	0.0769		IKBKB,NFKB2
TNFR2 Signaling	0.0398107	0.0769		IKBKB,NFKB2
ILK Signaling	0.040738	0.0323	-1	ACTA1,CCND1,IRS1,NFKB2,RHOBTB1
Gα12/13 Signaling	0.0446684	0.0367	0	ARHGEF1,CDH4,IKBKB,NFKB2
Cyclins and Cell Cycle Regulation	0.0446684	0.0462		BTRC,CCND1,HDAC7
Notch Signaling	0.0457088	0.0714		HEY1,NOTCH4
NAD Phosphorylation and Dephosphorylation	0.047863	0.25		NADK2
Type II Diabetes Mellitus Signaling	0.0524807	0.0348	-1	GCK,IKBKB,IRS1,NFKB2
4-1BB Signaling in T Lymphocytes	0.0549541	0.0645		IKBKB,NFKB2
Regulation of Actin-based Motility by Rho	0.057544	0.0417		ACTA1,GSN,RHOBTB1
PTEN Signaling	0.057544	0.0336	1	BCL2L11,CCND1,IKBKB,NFKB2
TWEAK Signaling	0.057544	0.0625		IKBKB,NFKB2
BMP signaling pathway	0.060256	0.0411		NFKB2,PRKAR1A,RUNX2
Tec Kinase Signaling	0.0630957	0.0325		ACTA1,NFKB2,RHOBTB1,STAT1
IL-17A Signaling in Fibroblasts	0.0645654	0.0588		IKBKB,NFKB2
Gαq Signaling	0.0645654	0.0323		IKBKB,NFKB2,RGS2,RHOBTB1
Death Receptor Signaling	0.0660693	0.0395		ACTA1,IKBKB,NFKB2
RANK Signaling in Osteoclasts	0.0676083	0.039		GSN,IKBKB,NFKB2
GDP-glucose Biosynthesis	0.0707946	0.167		GCK
IL-1 Signaling	0.0724436	0.038		IKBKB,NFKB2,PRKAR1A
Sumoylation Pathway	0.0724436	0.038		NFKB2,RHOBTB1,SENP2
B Cell Activating Factor Signaling	0.0776247	0.0526		IKBKB,NFKB2
April Mediated Signaling	0.0776247	0.0526		IKBKB,NFKB2
Signaling by Rho Family GTPases	0.0794328	0.0267	-2	ACTA1,ARHGEF1,CDH4,NFKB2,RHOBTB1
Synaptic Long Term Potentiation	0.0812831	0.0361		CAMK2G,PPP1R10,PRKAR1A
iCOS-iCOSL Signaling in T Helper Cells	0.0812831	0.0361		CAMK2G,IKBKB,NFKB2
Apoptosis Signaling	0.0812831	0.0361		BCL2L11,IKBKB,NFKB2
RhoGDI Signaling	0.0812831	0.0299		ACTA1,ARHGEF1,CDH4,RHOBTB1
PFKFB4 Signaling Pathway	0.0812831	0.0513		GCK,PRKAR1A
Glucose and Glucose-1-phosphate Degradation	0.0831764	0.143		GCK
UDP-N-acetyl-D-galactosamine Biosynthesis II	0.0831764	0.143		GCK
Type I Diabetes Mellitus Signaling	0.0870964	0.0349		IKBKB,NFKB2,STAT1
TNFR1 Signaling	0.0933254	0.0476		IKBKB,NFKB2
FAT10 Cancer Signaling Pathway	0.0933254	0.0476		IKBKB,NFKB2
Hepatic Fibrosis Signaling Pathway	0.0954993	0.0219	-1.134	CCND1,IKBKB,NFKB2,PRKAR1A,RHOBTB1,TFRC,TTN
Lymphotoxin β Receptor Signaling	0.100925	0.0455		IKBKB,NFKB2
Pancreatic Adenocarcinoma Signaling	0.104954	0.0323		CCND1,NFKB2,STAT1
Role of PKR in Interferon Induction and Antiviral Response	0.107895	0.0319		IKBKB,NFKB2,STAT1
CD27 Signaling in Lymphocytes	0.107895	0.0435		IKBKB,NFKB2
Colorectal Cancer Metastasis Signaling	0.110917	0.024	0	CCND1,NFKB2,PRKAR1A,RHOBTB1,STAT1
PPARα/RXRα Activation	0.11298	0.0265	0	IKBKB,IRS1,NFKB2,PRKAR1A
Renin-Angiotensin Signaling	0.118032	0.0306		NFKB2,PRKAR1A,STAT1
Androgen Signaling	0.118032	0.0306		CCND1,NFKB2,PRKAR1A
G-Protein Coupled Receptor Signaling	0.11995	0.0235		CAMK2G,IKBKB,NFKB2,PRKAR1A,RGS2
Integrin Signaling	0.121899	0.0258		ACTA1,GSN,RHOBTB1,TTN
ERK/MAPK Signaling	0.127938	0.0253	1	ELF1,PPP1R10,PRKAR1A,STAT1
mTOR Signaling	0.130017	0.0252		ATG13,EIF4G3,IRS1,RHOBTB1
IL-12 Signaling and Production in Macrophages	0.13213	0.0291		IKBKB,NFKB2,STAT1
PKCθ Signaling in T Lymphocytes	0.13213	0.0291		CAMK2G,IKBKB,NFKB2
Role of JAK1 and JAK3 in γc Cytokine Signaling	0.137088	0.0377		IRS1,STAT1
Methionine Degradation I (to Homocysteine)	0.137088	0.0833		MAT2A
Nur77 Signaling in T Lymphocytes	0.140929	0.037		HDAC7,NR4A1
EIF2 Signaling	0.142889	0.0242		ACTA1,CCND1,DDIT3,EIF4G3
CD40 Signaling	0.144877	0.0364		IKBKB,NFKB2
Melatonin Signaling	0.144877	0.0364		CAMK2G,PRKAR1A
Growth Hormone Signaling	0.144877	0.0364		IRS1,STAT1
Insulin Receptor Signaling	0.145881	0.0278		IRS1,PPP1R10,PRKAR1A
MSP-RON Signaling In Cancer Cells Pathway	0.145881	0.0278		CCND1,ELF1,NFKB2
Cysteine Biosynthesis III (mammalia)	0.147911	0.0769		MAT2A
Induction of Apoptosis by HIV1	0.15417	0.0351		IKBKB,NFKB2
Estrogen-Dependent Breast Cancer Signaling	0.15417	0.0351		CCND1,NFKB2
Ephrin B Signaling	0.15417	0.0351		ABI1,HNRNPK
Angiopoietin Signaling	0.158125	0.0345		IKBKB,NFKB2
Dopamine Receptor Signaling	0.158125	0.0345		PPP1R10,PRKAR1A
Actin Cytoskeleton Signaling	0.158855	0.0233		ACTA1,ARHGEF1,GSN,TTN
Dendritic Cell Maturation	0.159956	0.0265		IKBKB,NFKB2,STAT1
IL-17A Signaling in Airway Cells	0.167109	0.0333		IKBKB,NFKB2
IL-7 Signaling Pathway	0.167109	0.0333		CCND1,STAT1
Necroptosis Signaling Pathway	0.169044	0.0259		CAMK2G,IKBKB,STAT1
IL-10 Signaling	0.171002	0.0328		IKBKB,NFKB2
Protein Ubiquitination Pathway	0.177828	0.0222		BTRC,CRYAB,UBE2D3,UCHL5
HIPPO signaling	0.179887	0.0317		BTRC,PPP1R10
JAK/Stat Signaling	0.179887	0.0317		NFKB2,STAT1
Tight Junction Signaling	0.187068	0.0246		ACTA1,NFKB2,PRKAR1A
DNA Methylation and Transcriptional Repression Signaling	0.188799	0.0588		MECP2
Endoplasmic Reticulum Stress Pathway	0.188799	0.0588		DDIT3
Phospholipase C Signaling	0.190108	0.0216		ARHGEF1,HDAC7,NFKB2,RHOBTB1
Endocannabinoid Cancer Inhibition Pathway	0.190108	0.0244		CCND1,DDIT3,PRKAR1A
NF-κB Activation by Viruses	0.193197	0.0303		IKBKB,NFKB2
Estrogen Receptor Signaling	0.193197	0.0199	-1.342	CCND1,MED16,NFKB2,PRKAR1A,RUNX2
GADD45 Signaling	0.199067	0.0556		CCND1
Inflammasome pathway	0.199067	0.0556		NFKB2
Germ Cell-Sertoli Cell Junction Signaling	0.199986	0.0238		ACTA1,GSN,RHOBTB1
Neuropathic Pain Signaling In Dorsal Horn Neurons	0.206063	0.029		CAMK2G,PRKAR1A
GNRH Signaling	0.206063	0.0234		CAMK2G,NFKB2,PRKAR1A
Prolactin Signaling	0.206063	0.029		IRS1,STAT1
Toll-like Receptor Signaling	0.206063	0.029		IKBKB,NFKB2
Systemic Lupus Erythematosus In B Cell Signaling Pathway	0.206063	0.0209	-1	BCL2L11,CCND1,NFKB2,STAT1
BEX2 Signaling Pathway	0.206063	0.029		CCND1,NFKB2
Xenobiotic Metabolism PXR Signaling Pathway	0.206063	0.0234		CAMK2G,PPP1R10,PRKAR1A
Ethanol Degradation II	0.20893	0.0526		ADH1C
Thyroid Cancer Signaling	0.210863	0.0286		CCND1,IRS1
PEDF Signaling	0.210863	0.0286		IKBKB,NFKB2
Estrogen-mediated S-phase Entry	0.217771	0.05		CCND1
Retinoate Biosynthesis I	0.217771	0.05		ADH1C
Noradrenaline and Adrenaline Degradation	0.217771	0.05		ADH1C
LPS-stimulated MAPK Signaling	0.219786	0.0278		IKBKB,NFKB2
Regulation of IL-2 Expression in Activated and Anergic T Lymphocytes	0.229087	0.027		IKBKB,NFKB2
Protein Kinase A Signaling	0.230144	0.0187		CAMK2G,NFKB2,PPP1R10,PRKAR1A,TTN
Wnt/β-catenin Signaling	0.231739	0.0221		BTRC,CCND1,SOX18
B Cell Receptor Signaling	0.234963	0.0219		CAMK2G,IKBKB,NFKB2
IL-22 Signaling	0.237137	0.0455		STAT1
Superpathway of Methionine Degradation	0.237137	0.0455		MAT2A
Apelin Liver Signaling Pathway	0.237137	0.0455		IRS1
Prostate Cancer Signaling	0.238232	0.0263		CCND1,NFKB2
Antioxidant Action of Vitamin C	0.238232	0.0263		IKBKB,NFKB2
Acute Myeloid Leukemia Signaling	0.247172	0.0256		CCND1,NFKB2
T Cell Receptor Signaling	0.247172	0.0256		IKBKB,NFKB2
Virus Entry via Endocytic Pathways	0.251189	0.0253		ACTA1,TFRC
SAPK/JNK Signaling	0.251189	0.0253		HNRNPK,IRS1
Senescence Pathway	0.25293	0.0191	1	CCND1,ELF1,IKBKB,NFKB2
Role of JAK family kinases in IL-6-type Cytokine Signaling	0.255859	0.0417		STAT1
Phototransduction Pathway	0.255859	0.0417		PRKAR1A
Acute Phase Response Signaling	0.264241	0.0205		HNRNPK,IKBKB,NFKB2
Cellular Effects of Sildenafil (Viagra)	0.26485	0.0244		ACTA1,PRKAR1A
Sonic Hedgehog Signaling	0.26485	0.04		PRKAR1A
Adrenomedullin signaling pathway	0.267917	0.0204		NFKB2,PRKAR1A,TTN
CDK5 Signaling	0.269774	0.0241		PPP1R10,PRKAR1A
NF-κB Signaling	0.28119	0.0199		BTRC,IKBKB,NFKB2
Gαs Signaling	0.291743	0.0227		PRKAR1A,RGS2
Interferon Signaling	0.291743	0.0357		STAT1
Th1 Pathway	0.291743	0.0227		NOTCH4,STAT1
Cell Cycle Regulation by BTG Family Proteins	0.299916	0.0345		CCND1
Serotonin Degradation	0.299916	0.0345		ADH1C
Triacylglycerol Biosynthesis	0.299916	0.0345		LPIN3
CD28 Signaling in T Helper Cells	0.301301	0.0222		IKBKB,NFKB2
NGF Signaling	0.301301	0.0222		IKBKB,NFKB2
Telomerase Signaling	0.301301	0.0222		ELF1,HDAC7
Sperm Motility	0.304089	0.019		CLK1,DDR1,PRKAR1A
Reelin Signaling in Neurons	0.306196	0.022		ARHGEF1,CAMK2G
Glioma Signaling	0.306196	0.022		CAMK2G,CCND1
RAR Activation	0.308319	0.0189		ADH1C,NFKB2,PRKAR1A
MIF-mediated Glucocorticoid Regulation	0.30903	0.0333		NFKB2
PPAR Signaling	0.309742	0.0217		IKBKB,NFKB2
IGF-1 Signaling	0.309742	0.0217		IRS1,PRKAR1A
Hepatic Cholestasis	0.311172	0.0187		IKBKB,NFKB2,PRKAR1A
BAG2 Signaling Pathway	0.316957	0.0323		NFKB2
Endocannabinoid Developing Neuron Pathway	0.32434	0.0211		CCND1,PRKAR1A
PI3K/AKT Signaling	0.325087	0.0183		CCND1,IKBKB,NFKB2
Mechanisms of Viral Exit from Host Cells	0.325837	0.0312		ACTA1
p38 MAPK Signaling	0.328095	0.0208		DDIT3,STAT1
White Adipose Tissue Browning Pathway	0.328095	0.0208		PRKAR1A,RUNX1T1
Role of NFAT in Cardiac Hypertrophy	0.331131	0.0181		CAMK2G,HDAC7,PRKAR1A
Cardiac β-adrenergic Signaling	0.33266	0.0206		PPP1R10,PRKAR1A
OX40 Signaling Pathway	0.334195	0.0303		NFKB2
Role of IL-17F in Allergic Inflammatory Airway Diseases	0.334195	0.0303		NFKB2
IL-8 Signaling	0.334965	0.018		CCND1,IKBKB,RHOBTB1
Hereditary Breast Cancer Signaling	0.337287	0.0204		CCND1,HDAC7
P2Y Purigenic Receptor Signaling Pathway	0.337287	0.0204		NFKB2,PRKAR1A
Semaphorin Neuronal Repulsive Signaling Pathway	0.337287	0.0204		NRP2,PRKAR1A
Apelin Endothelial Signaling Pathway	0.341979	0.0202		KLF2,NFKB2
AMPK Signaling	0.348337	0.0175		CCND1,IRS1,PRKAR1A
Autophagy	0.349945	0.0286		ATG13
cAMP-mediated signaling	0.350752	0.0174		CAMK2G,PRKAR1A,RGS2
HGF Signaling	0.354813	0.0196		CCND1,ELF1
Breast Cancer Regulation by Stathmin1	0.354813	0.0152	-1.633	ARHGEF1,CAMK2G,CCND1,NFKB2,PPP1R10,PRKAR1A
Opioid Signaling Pathway	0.354813	0.0173		CAMK2G,NFKB2,PRKAR1A
Iron homeostasis signaling pathway	0.354813	0.0196		BTRC,TFRC
Oncostatin M Signaling	0.358096	0.0278		STAT1
IL-23 Signaling Pathway	0.358096	0.0278		NFKB2
Cell Cycle: G2/M DNA Damage Checkpoint Regulation	0.365595	0.027		BTRC
Cardiac Hypertrophy Signaling	0.372392	0.0169		IRS1,PRKAR1A,RHOBTB1
MIF Regulation of Innate Immunity	0.374111	0.0263		NFKB2
Semaphorin Signaling in Neurons	0.381944	0.0256		RHOBTB1
Wnt/Ca+ pathway	0.381944	0.0256		NFKB2
Glucocorticoid Receptor Signaling	0.382825	0.0151		BCL2L11,FKBP5,IKBKB,STAT1,TFB2M
Corticotropin Releasing Hormone Signaling	0.386367	0.0183		NR4A1,PRKAR1A
Role of Osteoblasts, Osteoclasts and Chondrocytes in Rheumatoid Arthritis	0.38815	0.0164		GSN,IKBKB,RUNX2
Role of PI3K/AKT Signaling in the Pathogenesis of Influenza	0.389045	0.025		NFKB2
MSP-RON Signaling Pathway	0.389045	0.025		ACTA1
Relaxin Signaling	0.389942	0.0182		NFKB2,PRKAR1A
Melanoma Signaling	0.397192	0.0244		CCND1
IL-6 Signaling	0.399025	0.0179		IKBKB,NFKB2
Amyloid Processing	0.403645	0.0238		PRKAR1A
Ovarian Cancer Signaling	0.408319	0.0175		CCND1,PRKAR1A
CNTF Signaling	0.418794	0.0227		STAT1
Unfolded protein response	0.418794	0.0227		DDIT3
Dopamine-DARPP32 Feedback in cAMP Signaling	0.419759	0.0171		PPP1R10,PRKAR1A
Synaptogenesis Signaling Pathway	0.420727	0.0155		CAMK2G,CDH4,PRKAR1A
Factors Promoting Cardiogenesis in Vertebrates	0.42462	0.0169		CAMK2G,CCND1
Netrin Signaling	0.425598	0.0222		PRKAR1A
GPCR-Mediated Integration of Enteroendocrine Signaling Exemplified by an L Cell	0.425598	0.0222		PRKAR1A
Calcium-induced T Lymphocyte Apoptosis	0.432514	0.0217		NR4A1
Epithelial Adherens Junction Signaling	0.432514	0.0167		ACTA1,NOTCH4
Aryl Hydrocarbon Receptor Signaling	0.436516	0.0165		CCND1,NFKB2
HOTAIR Regulatory Pathway	0.436516	0.0165		MTF2,NFKB2
Glioblastoma Multiforme Signaling	0.440555	0.0164		CCND1,RHOBTB1
Remodeling of Epithelial Adherens Junctions	0.446684	0.0208		ACTA1
Role of NFAT in Regulation of the Immune Response	0.44978	0.0161		IKBKB,NFKB2
Role of BRCA1 in DNA Damage Response	0.453942	0.0204		STAT1
T Helper Cell Differentiation	0.453942	0.0204		STAT1
Role of IL-17A in Arthritis	0.453942	0.0204		NFKB2
Th1 and Th2 Activation Pathway	0.458142	0.0159		NOTCH4,STAT1
EGF Signaling	0.460257	0.02		STAT1
HMGB1 Signaling	0.462381	0.0157		NFKB2,RHOBTB1
Endometrial Cancer Signaling	0.466659	0.0196		CCND1
ErbB2-ErbB3 Signaling	0.466659	0.0196		CCND1
Sirtuin Signaling Pathway	0.468813	0.0144		ATG13,BCL2L11,NFKB2
Regulation of eIF4 and p70S6K Signaling	0.469894	0.0155		EIF4G3,IRS1
Thrombopoietin Signaling	0.473151	0.0192		STAT1
Agrin Interactions at Neuromuscular Junction	0.473151	0.0192		ACTA1
Erythropoietin Signaling	0.486407	0.015		CCND1,NFKB2
Glioma Invasiveness Signaling	0.486407	0.0185		RHOBTB1
Th17 Activation Pathway	0.486407	0.0185		NFKB2
Leptin Signaling in Obesity	0.498884	0.0179		PRKAR1A
Regulation of Cellular Mechanics by Calpain Protease	0.498884	0.0179		CCND1
Sertoli Cell-Sertoli Cell Junction Signaling	0.502343	0.0146		ACTA1,PRKAR1A
TREM1 Signaling	0.504661	0.0175		NFKB2
Gap Junction Signaling	0.505825	0.0145		ACTA1,PRKAR1A
Caveolar-mediated Endocytosis Signaling	0.510505	0.0172		ACTA1
FLT3 Signaling in Hematopoietic Progenitor Cells	0.516416	0.0169		STAT1
PXR/RXR Activation	0.5236	0.0167		PRKAR1A
Non-Small Cell Lung Cancer Signaling	0.5236	0.0167		CCND1
ERK5 Signaling	0.5236	0.0167		WNK1
GDNF Family Ligand-Receptor Interactions	0.5236	0.0167		IRS1
Chemokine Signaling	0.5236	0.0167		CAMK2G
Cardiac Hypertrophy Signaling (Enhanced)	0.5236	0.0128	1.342	CAMK2G,HDAC7,IKBKB,NFKB2,PRKAR1A
Altered T Cell and B Cell Signaling in Rheumatoid Arthritis	0.528445	0.0164		NFKB2
Neuroprotective Role of THOP1 in Alzheimer's Disease	0.528445	0.0164		PRKAR1A
IL-4 Signaling	0.528445	0.0164		IRS1
Hypoxia Signaling in the Cardiovascular System	0.528445	0.0164		UBE2D3
Macropinocytosis Signaling	0.528445	0.0164		ABI1
Neuroinflammation Signaling Pathway	0.530884	0.0132		IKBKB,NFKB2,STAT1
Tumor Microenvironment Pathway	0.532108	0.0138		CCND1,NFKB2
Actin Nucleation by ARP-WASP Complex	0.534564	0.0161		RHOBTB1
NRF2-mediated Oxidative Stress Response	0.539511	0.0136		ACTA1,FKBP5
IL-15 Signaling	0.539511	0.0159		NFKB2
Neurotrophin/TRK Signaling	0.539511	0.0159		SPRY1
Xenobiotic Metabolism AHR Signaling Pathway	0.539511	0.0159		NFKB2
Clathrin-mediated Endocytosis Signaling	0.550808	0.0133		ACTA1,TFRC
IL-3 Signaling	0.557186	0.0152		STAT1
UVA-Induced MAPK Signaling	0.557186	0.0152		STAT1
Hepatic Fibrosis / Hepatic Stellate Cell Activation	0.561048	0.0131		NFKB2,STAT1
Regulation of the Epithelial-Mesenchymal Transition Pathway	0.567545	0.0129		NFKB2,NOTCH4
Regulation Of The Epithelial Mesenchymal Transition In Development Pathway	0.567545	0.0147		NFKB2
HER-2 Signaling in Breast Cancer	0.572796	0.0145		CCND1
PDGF Signaling	0.572796	0.0145		STAT1
Apelin Adipocyte Signaling Pathway	0.572796	0.0145		PRKAR1A
Regulation Of The Epithelial Mesenchymal Transition By Growth Factors Pathway	0.57544	0.0127		IKBKB,NFKB2
ATM Signaling	0.579429	0.0143		KAT5
VEGF Family Ligand-Receptor Interactions	0.579429	0.0143		NRP2
VDR/RXR Activation	0.588844	0.0139		RUNX2
GPCR-Mediated Nutrient Sensing in Enteroendocrine Cells	0.588844	0.0139		PRKAR1A
Melanocyte Development and Pigmentation Signaling	0.594292	0.0137		PRKAR1A
Ceramide Signaling	0.598412	0.0135		NFKB2
α-Adrenergic Signaling	0.598412	0.0135		PRKAR1A
Bladder Cancer Signaling	0.598412	0.0135		CCND1
VEGF Signaling	0.609537	0.0132		ACTA1
Fcγ Receptor-mediated Phagocytosis in Macrophages and Monocytes	0.613762	0.013		ACTA1
FAK Signaling	0.628058	0.0125		ACTA1
Endocannabinoid Neuronal Synapse Pathway	0.628058	0.0125		PRKAR1A
Natural Killer Cell Signaling	1	0.00813		NFKB2
Leukocyte Extravasation Signaling	1	0.00704		ACTA1
Axonal Guidance Signaling	1	0.0117		KLC1,NRP2,PLXNB2,PRKAR1A
Huntington's Disease Signaling	1	0.00575		HDAC7
p53 Signaling	1	0.0122		CCND1
LXR/RXR Activation	1	0.0105		NFKB2
FXR/RXR Activation	1	0.0104		MTTP
Role of Pattern Recognition Receptors in Recognition of Bacteria and Viruses	1	0.0087		NFKB2
fMLP Signaling in Neutrophils	1	0.0102		NFKB2
CXCR4 Signaling	1	0.008		RHOBTB1
HIF1α Signaling	1	0.0119		CAMK2G,GCK
Cholecystokinin/Gastrin-mediated Signaling	1	0.0105		RHOBTB1
Aldosterone Signaling in Epithelial Cells	1	0.01		CRYAB
CREB Signaling in Neurons	1	0.00508		CAMK2G,PRKAR1A
p70S6K Signaling	1	0.0099		IRS1
G Beta Gamma Signaling	1	0.0116		PRKAR1A
Sphingosine-1-phosphate Signaling	1	0.0119		RHOBTB1
Cdc42 Signaling	1	0.0105		CDC42BPA
Rac Signaling	1	0.0103		NFKB2
Atherosclerosis Signaling	1	0.0103		NFKB2
Role of Macrophages, Fibroblasts and Endothelial Cells in Rheumatoid Arthritis	1	0.0119		CAMK2G,CCND1,IKBKB
Paxillin Signaling	1	0.0122		ACTA1
eNOS Signaling	1	0.0084		PRKAR1A
Gαi Signaling	1	0.0102		PRKAR1A
Agranulocyte Adhesion and Diapedesis	1	0.00781		ACTA1
Nitric Oxide Signaling in the Cardiovascular System	1	0.0122		PRKAR1A
Xenobiotic Metabolism Signaling	1	0.00952		CAMK2G,NFKB2
TGF-β Signaling	1	0.0122		RUNX2
Gustation Pathway	1	0.0112		PRKAR1A
Phagosome Formation	1	0.0115		RHOBTB1
Th2 Pathway	1	0.0103		NOTCH4
Osteoarthritis Pathway	1	0.0111		NFKB2,RUNX2
T Cell Exhaustion Signaling Pathway	1	0.00893		STAT1
Systemic Lupus Erythematosus In T Cell Signaling Pathway	1	0.0121		ELF1,RHOBTB1
Inhibition of ARE-Mediated mRNA Degradation Pathway	1	0.0119		PRKAR1A
Ephrin Receptor Signaling	1	0.00676		ABI1
